# Supplementary material for: Sensitive Assay for the Lactonase Activity of Serum Paraoxonase 1 (PON1) by Harnessing the Fluorescence Turn-On Characteristics of Bioorthogonally Synthesized and Geometrically Controlled Chemical Probes
Source: MDPI journal article supplement (doi:10.3390/molecules27082435), 2022-04-09

## Supplementary Materials

**Sensitive assay for the lactonase activity of serum paraoxonase 1 (PON1) by  
harnessing the fluorescence turn-on characteristics of bioorthogonally  
synthesized and geometrically controlled chemical probes**

Bo-Kai Fang <sup>1,†</sup>, Chia-Yen Dai <sup>2,3,†</sup>, Scott Severance <sup>4</sup>, Chi-Ching Hwang <sup>5</sup>, Chien-Hui  
Huang <sup>1</sup>, Sin-Yu Hou <sup>1</sup>, Bao-Lin Yeh <sup>1</sup>, Ming-Mao Gong <sup>1</sup>, Yun-Hao Chou<sup>5</sup>, Jeh-Jeng  
Wang <sup>1</sup> and Tzu-Pin Wang <sup>1,6,\*</sup>

\* Corresponding author: [tzupinw@kmu.edu.tw](mailto:tzupinw@kmu.edu.tw)

\* Contact address: Department of Medicinal and Applied Chemistry and Kaohsiung  
Medical University Hospital, Kaohsiung Medical University, Kaohsiung, 80708,  
Taiwan.

<sup>†</sup>Auhors contributed equally to this study.

## Contents

|                       |       |
|-----------------------|-------|
| 1. Scheme S1.....     | S3    |
| 2. Figures S1-S5..... | S4-S9 |
| 3. References.....    | S10   |

|                                                                             |         |
|-----------------------------------------------------------------------------|---------|
| 4. $^1\text{H}$ and $^{13}\text{C}$ NMR, and HRMS Spectra of Compounds..... | S11-S37 |
|-----------------------------------------------------------------------------|---------|

# **Scheme**

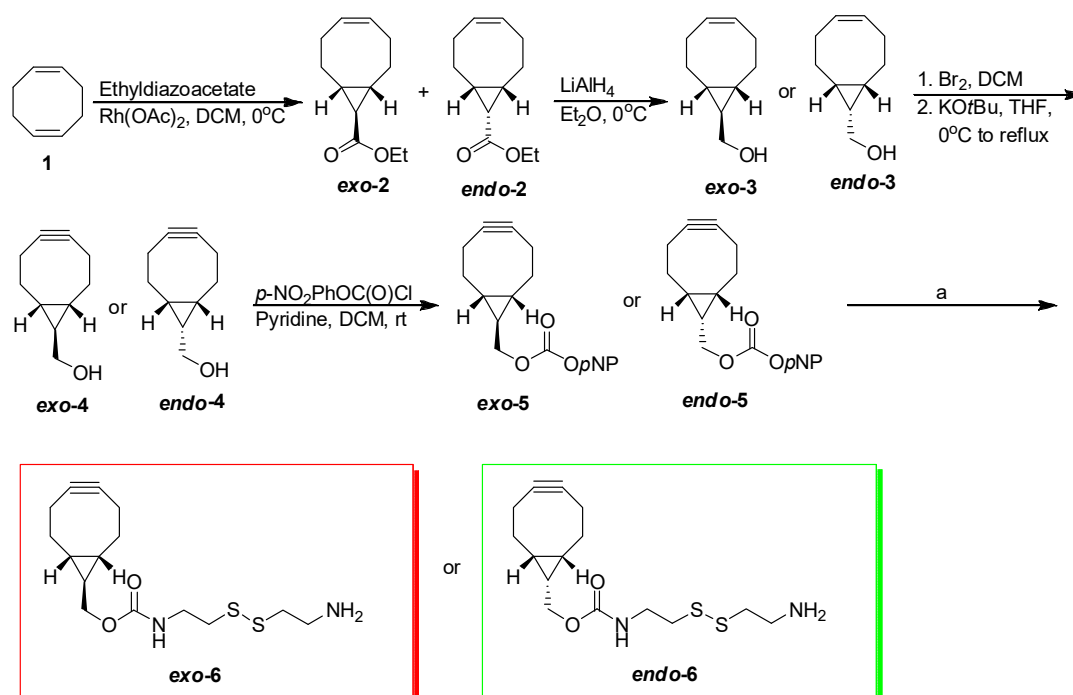

Scheme S1. Synthesis of the key bicyclononyne derivatives (**6**). Syntheses of **2** - **5**

were reported previously [1, 2]. a: cystamine, Et<sub>3</sub>N, MeOH/DCM, 50°C.

Figures.

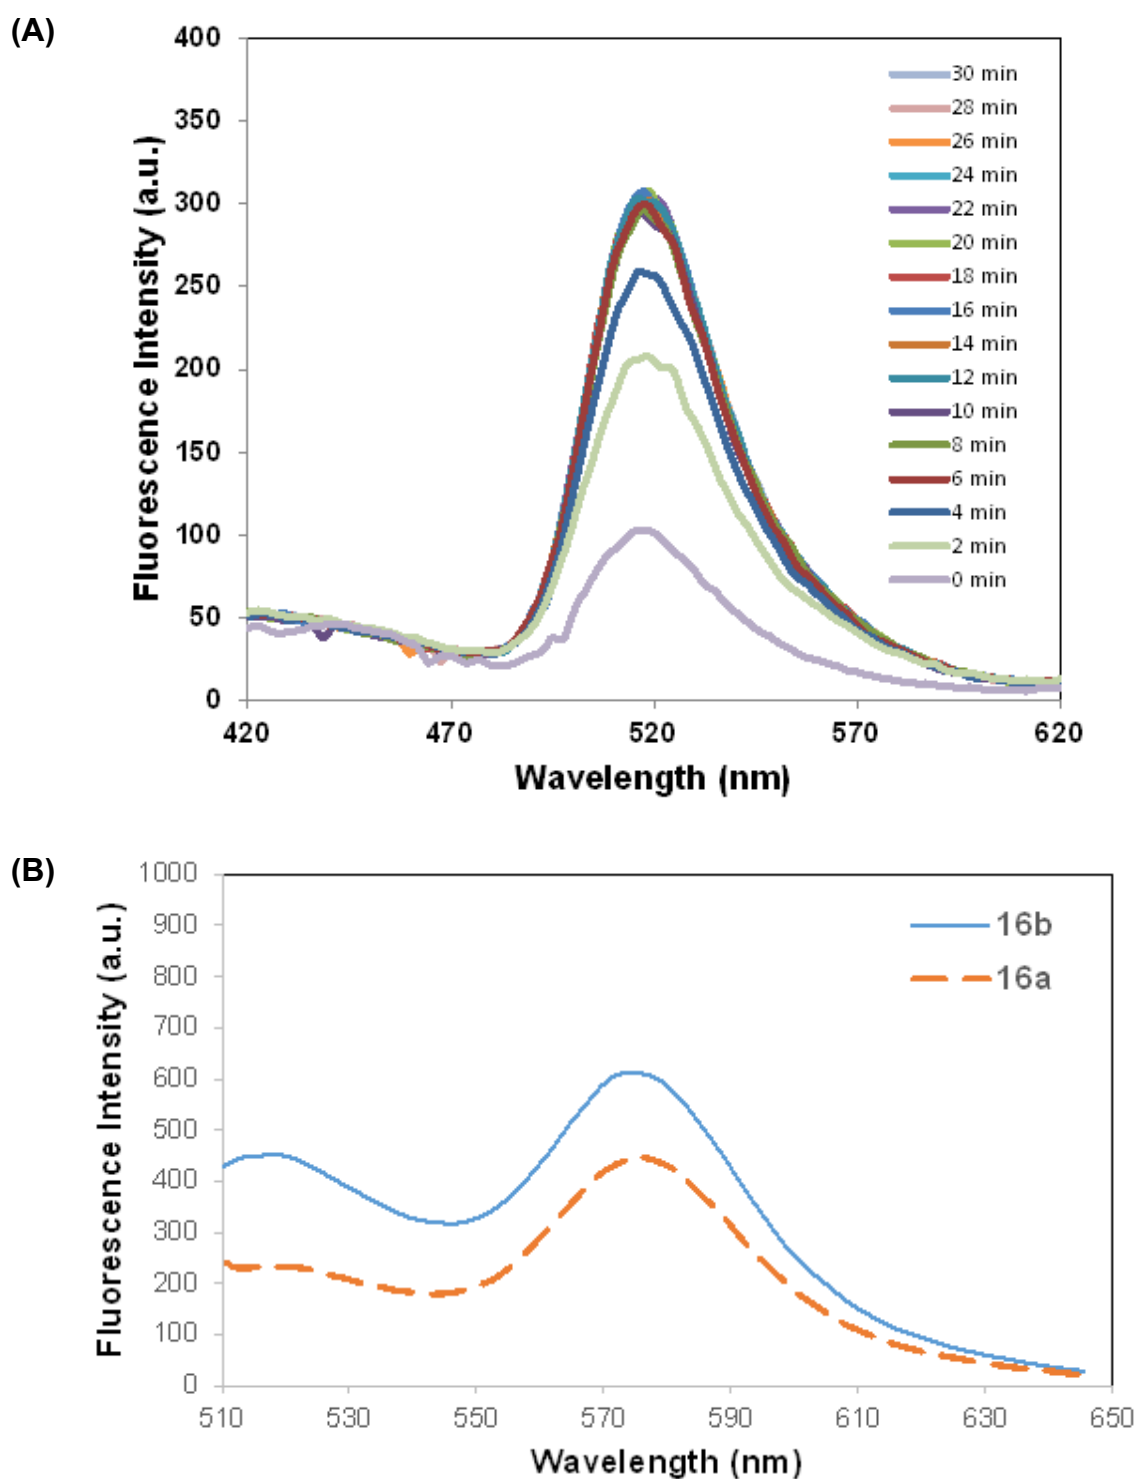

Figure S1. The fluorogenic property of the chemical probe **16a** when reacting with a thiol and the presence of residual FRET effects in **16**. (A) The time-dependent increase of the 5-FAM fluorescence in a reaction of **16a** (1  $\mu$ M) with L-cysteine (50 mM) in phosphate buffer (PB; 10% DMF, pH 7.4). (B) The fluorescence spectra of **16** (4  $\mu$ M each) in glacial acetic acid containing 0.8% of DMF. The excitation wavelength for **16a** was 494 nm and the excitation wavelength for **16b** was 491 nm.



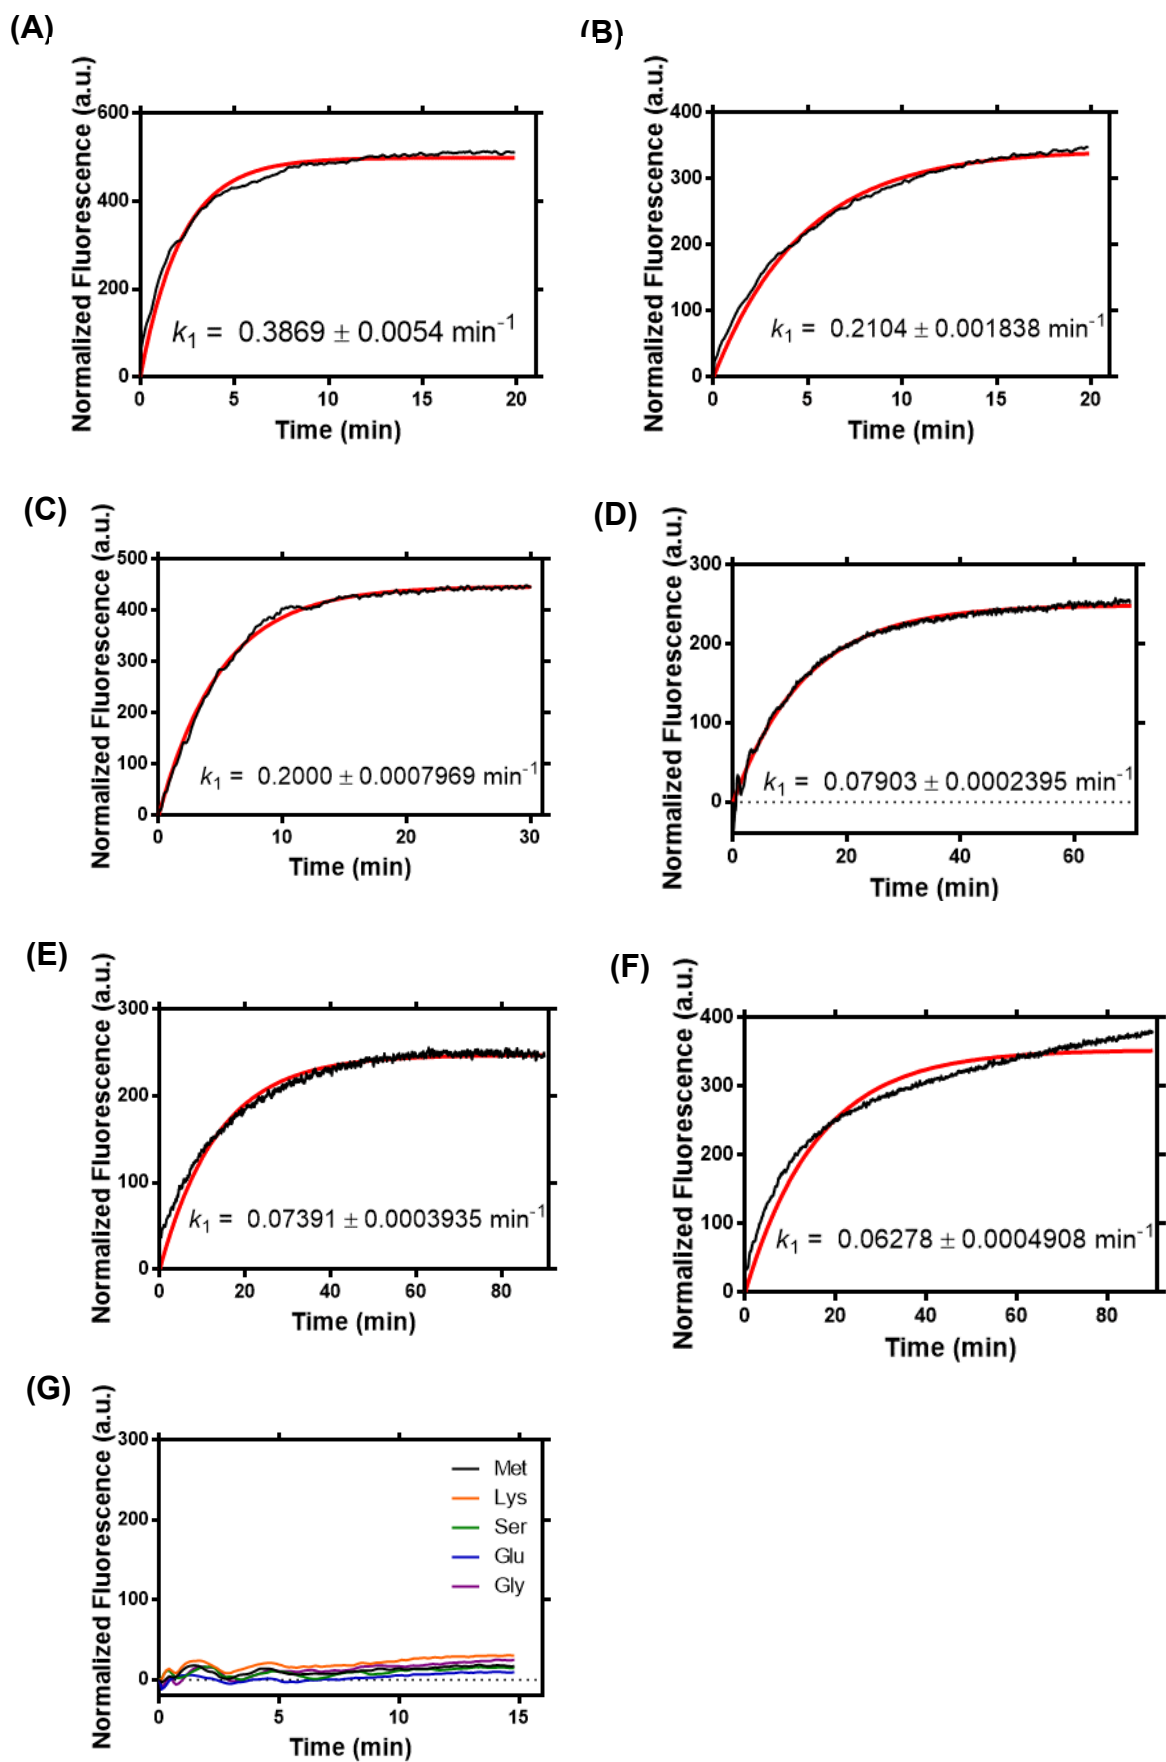

Figure S2. Representative pseudo-first-order reactions of **16b** (0.4  $\mu\text{M}$ ) with 5 mM of (A) 2-AET, (B) DTT, (C) L-cysteine, (D) GSH, (E) nBuSH, (F) 2-ThioEtOH, or (G) five non-thiol amino acids (L-methionine, L-lysine, L-serine, L-glutamate, and glycine) in the Tris buffer (50 mM Tris, 1 mM  $\text{Ca}^{2+}$ , pH 8.0). Progress of each reaction was monitored by measuring fluorescence emission at 525 nm at specific time intervals. Data of normalized 6-FAM fluorescence intensity (a.u.) vs time were fitted to a single-exponential equation for first-order kinetics  $F(t) = F_0 + F_{\text{max}}(1 - e^{-k_1 t})$  [ $F(t)$ , 6-FAM fluorescence at a specific time point  $t$ ] to provide the values of first-order rate constant  $k_1$  (GraphPad, La Jolla, CA, USA) illustrated in the graphs. In Panels S3A-S3F, the black lines indicate original fluorescence changes in the reaction time courses, and the red curves show the results calculated by the single-exponential equation. The normalized fluorescence intensity data at 525 nm were acquired by subtracting a background fluorescence of **16b** from the original fluorescence intensity measurements. 2-AET, 2-aminoethanethiol; nBuSH, 1-butanethiol; 2-ThioEtOH, 2-mercaptoethanol.

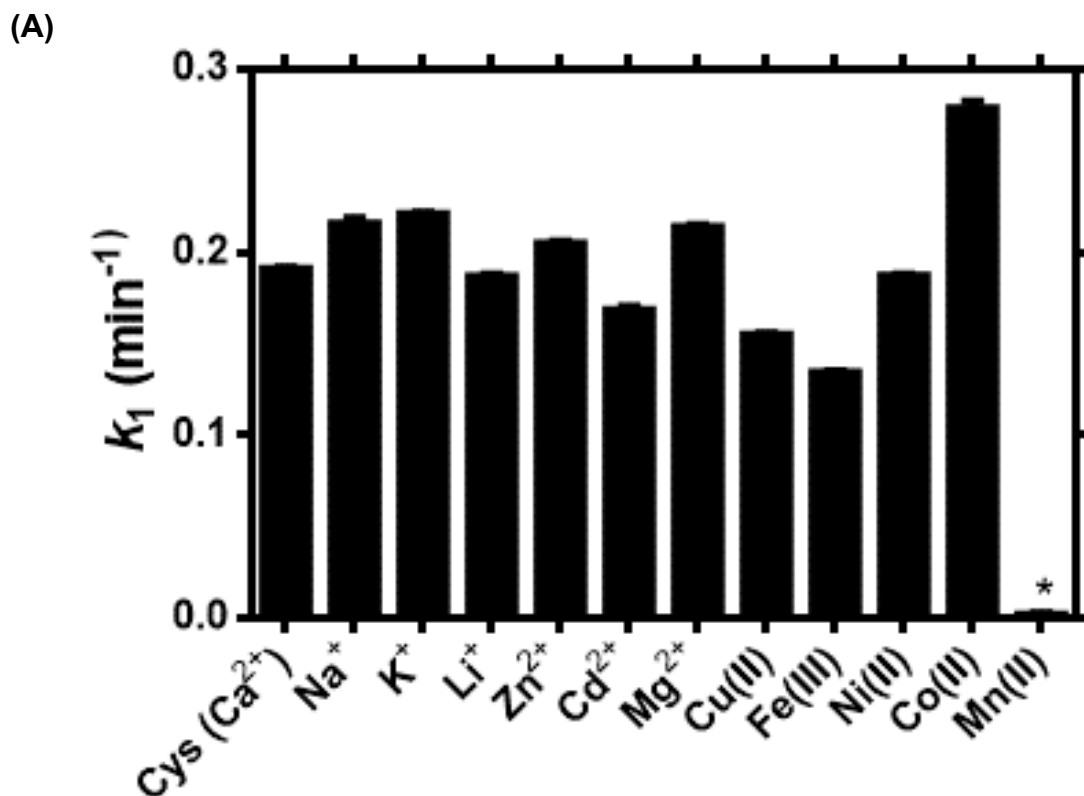

(B)

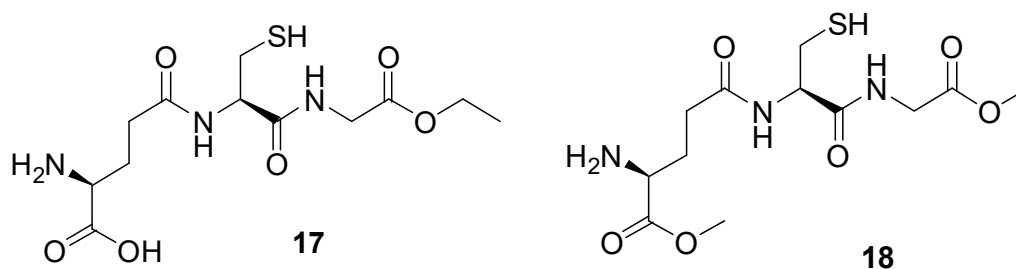

(C)

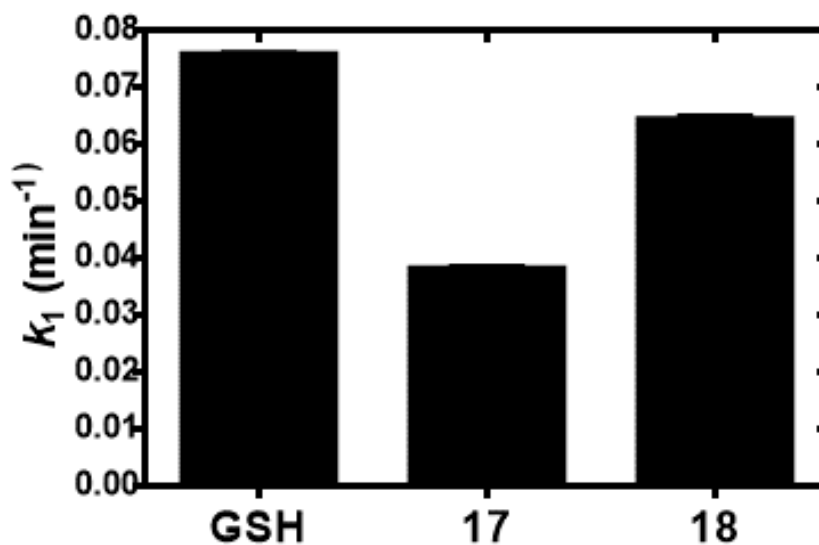

Figure S3. Influence of metal ions and steric constraints of **16b** on the thiol-dependent fluorogenic reaction of **16b**. (A) Effects of metal ion (1 mM) on the pseudo-first-order reactions of **16b** (0.4  $\mu$ M) with 5 mM L-cysteine in the Tris buffer. The  $k_1$  values were determined by a method analogous to what was described in Figure S2. The symbol \* indicates that **16b** had no detectable 6-FAM fluorescence change in the presence of Mn(II) with which the 6-FAM fluorescence change was so insignificant that the values of averaged  $k_1$  and standard deviation could not be determined. (B) Structures of two GSH derivatives **17** and **18** [2]. (C) Kinetic analysis of the pseudo-first-order reactions of **16b** (0.4  $\mu$ M) with 5 mM of one of the structure-modified GSH derivatives **17** and **18** in the Tris buffer. The  $k_1$  values were again determined by a method similar to that described in Figure S2. In addition, each reaction was analyzed at least three times in order to acquire the averaged  $k_1$  values and standard deviation (the error bar).

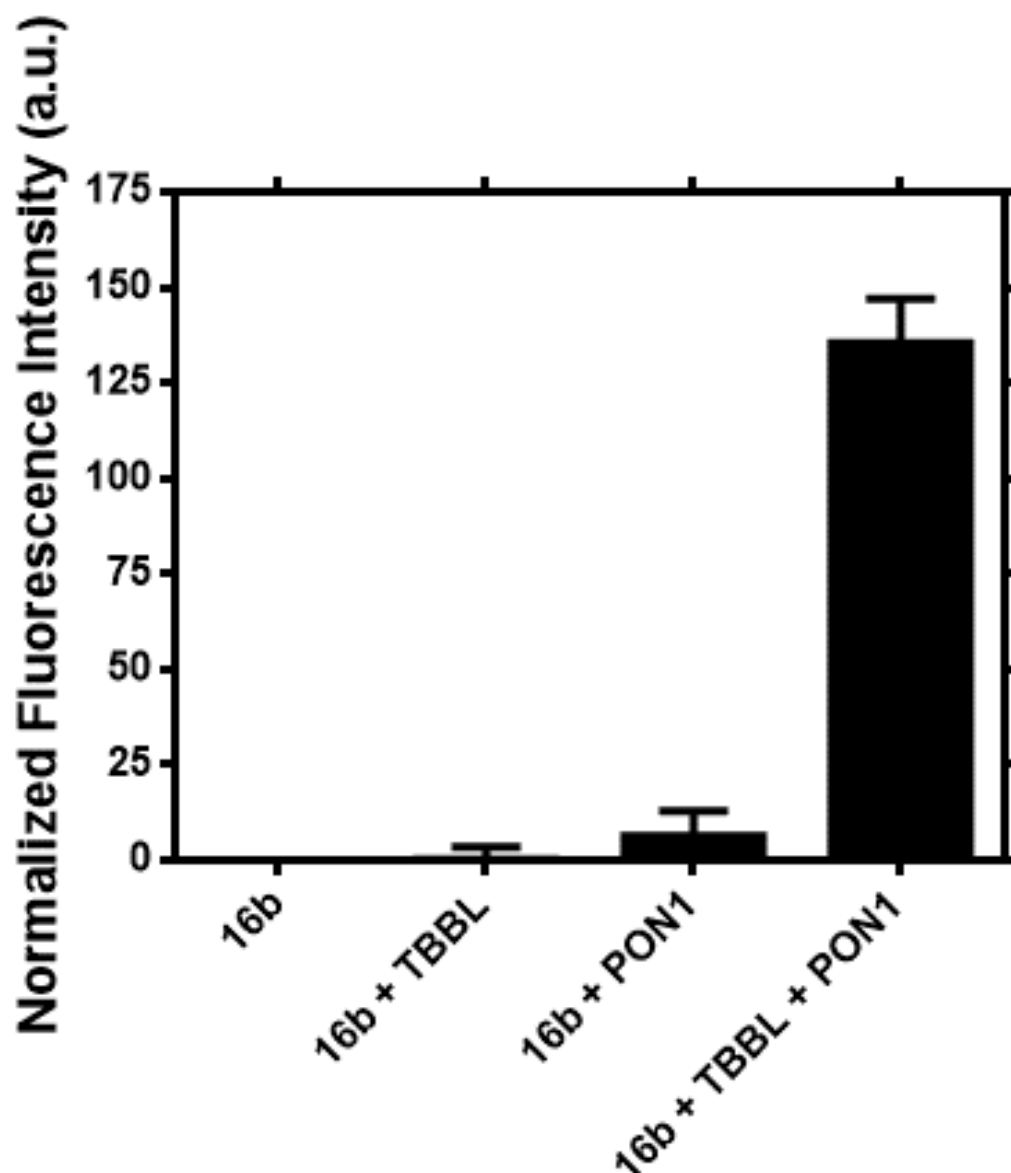

Figure S4. Presence of PON1 and TBBL is required for the fluorogenic property of **16b**. PON1 lactonase activity was determined by measuring the 6-FAM fluorescence released from **16b** in the spectrofluorometer. A **16b** ( $0.8 \mu\text{M}$  in DMSO, 1.6%) solution might be supplemented with PON1 ( $125.6 \text{ U L}^{-1}$ , 3.25% glycerol), TBBL (10 mM in ACN, 1%), or both in the Tris buffer. The **16b** reactions were carried out at  $25^\circ\text{C}$  for 30 min and immediately determined fluorescence emission afterward. The normalized fluorescence intensity data at 525 nm were acquired by subtracting a background fluorescence of **16b** at the same wavelength from the original fluorescence intensity readings. Each reaction was analyzed three times in order to acquire the averaged fluorescence values and standard deviation (the error bar).

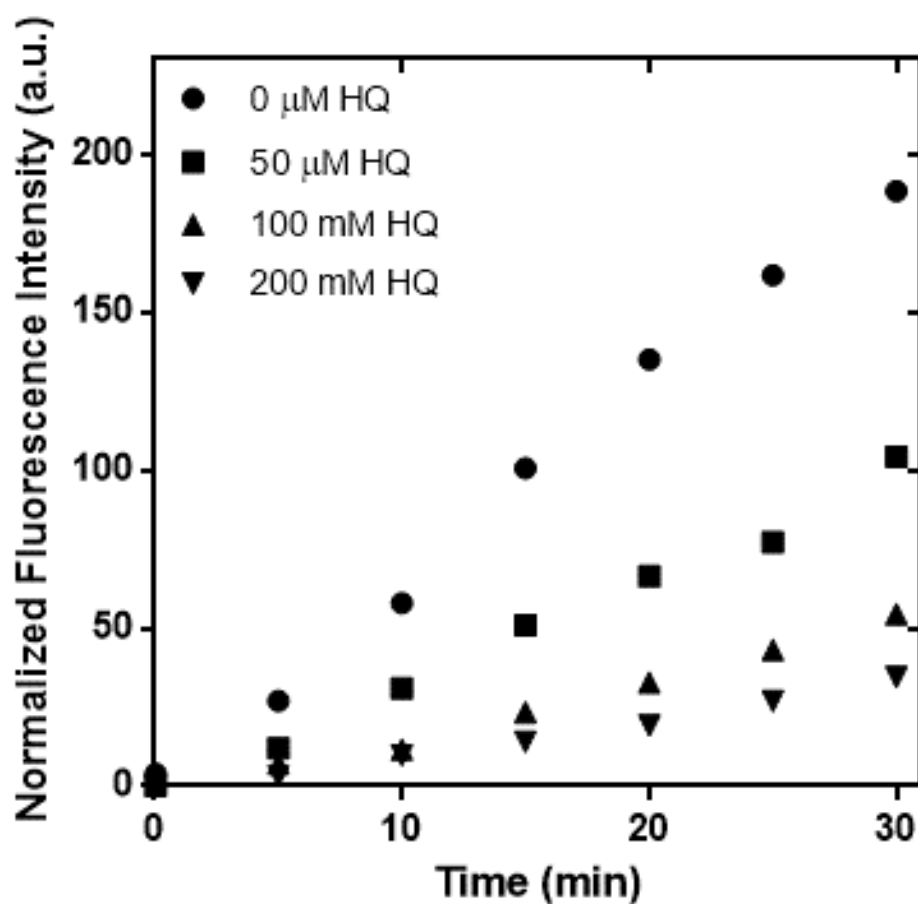

Figure S5. 2-Hydroxyquinoline (HQ) inhibition on PON1 catalysis analyzed by the fluorescence assay based on **16b**. Time-course kinetic analysis of HQ inhibition on PON1 ( $250.9 \text{ U L}^{-1}$ , 1.25% glycerol) catalysis was performed in the presence of TBBL (10 mM in ACN, 1.5%) in the Tris buffer. Each PON1 reaction contained 0, 50, 100 or 200  $\mu\text{M}$  of HQ in 1.5% ACN.

## References

- [1] J. Dommerholt, S. Schmidt, R. Temming, L.J.A. Hendriks, F.P.J.T. Rutjes, J.C.M. van Hest, D.J. Lefeber, P. Friedl, F.L. van Delft, Readily Accessible Bicyclononynes for Bioorthogonal Labeling and Three-Dimensional Imaging of Living Cells, *Angew. Chem., Int. Ed.*, 49 (2010) 9422-9425.
- [2] M.-M. Gong, C.-Y. Dai, S. Severance, C.-C. Hwang, B.-K. Fang, H.-B. Lin, C.-H. Huang, C.-W. Ong, J.-J. Wang, P.-L. Lee, T.-P. Wang, A Bioorthogonally Synthesized and Disulfide-Containing Fluorescence Turn-On Chemical Probe for Measurements of Butyrylcholinesterase Activity and Inhibition in the Presence of Physiological Glutathione, *Catalysts*, 10 (2020) 1169.

# Spectra

## Mass Spectrum SmartFormula Report

### Analysis Info

Analysis Name D:\Data\c5\N3RHODAMINE\_000005.d  
Method broadband first signal  
Sample Name N3-Rhodamine  
Comment ESI Positive

6/4/2018 3:17:54 PM  
Operator: YU HSIAO-CHING  
Instrument: BRUKER FT-MS solariX

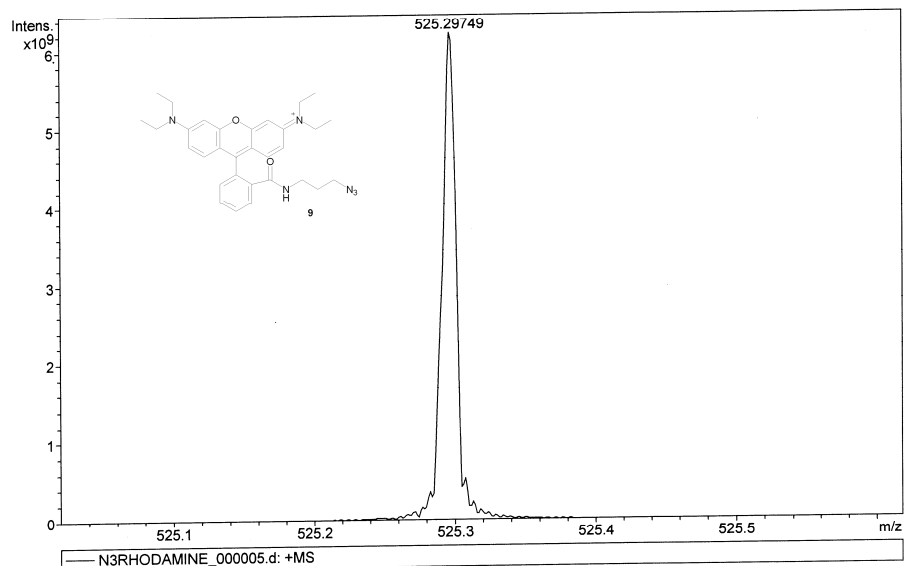

| Meas. m/z | # | Formula           | Score  | m/z       | err [mDa] | err [ppm] | mSigma | rdb  | e <sup>-</sup> Conf | N-Rule |
|-----------|---|-------------------|--------|-----------|-----------|-----------|--------|------|---------------------|--------|
| 525.29749 | 1 | C 31 H 37 N 6 O 2 | 100.00 | 525.29725 | -0.24     | -0.45     | 8.9    | 16.5 | even                | ok     |

N3-Rhodamine B

Pulse Sequence: s2pu1  
 Mercury-400MR  
 Date: Jun 15 2018  
 Solvent: cdcl3  
 Ambient temperature  
 Total 32 repetitions

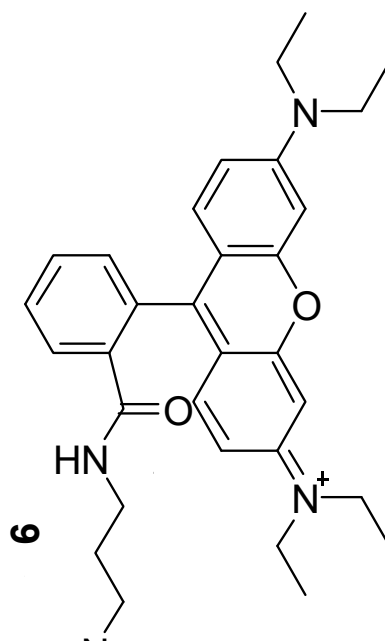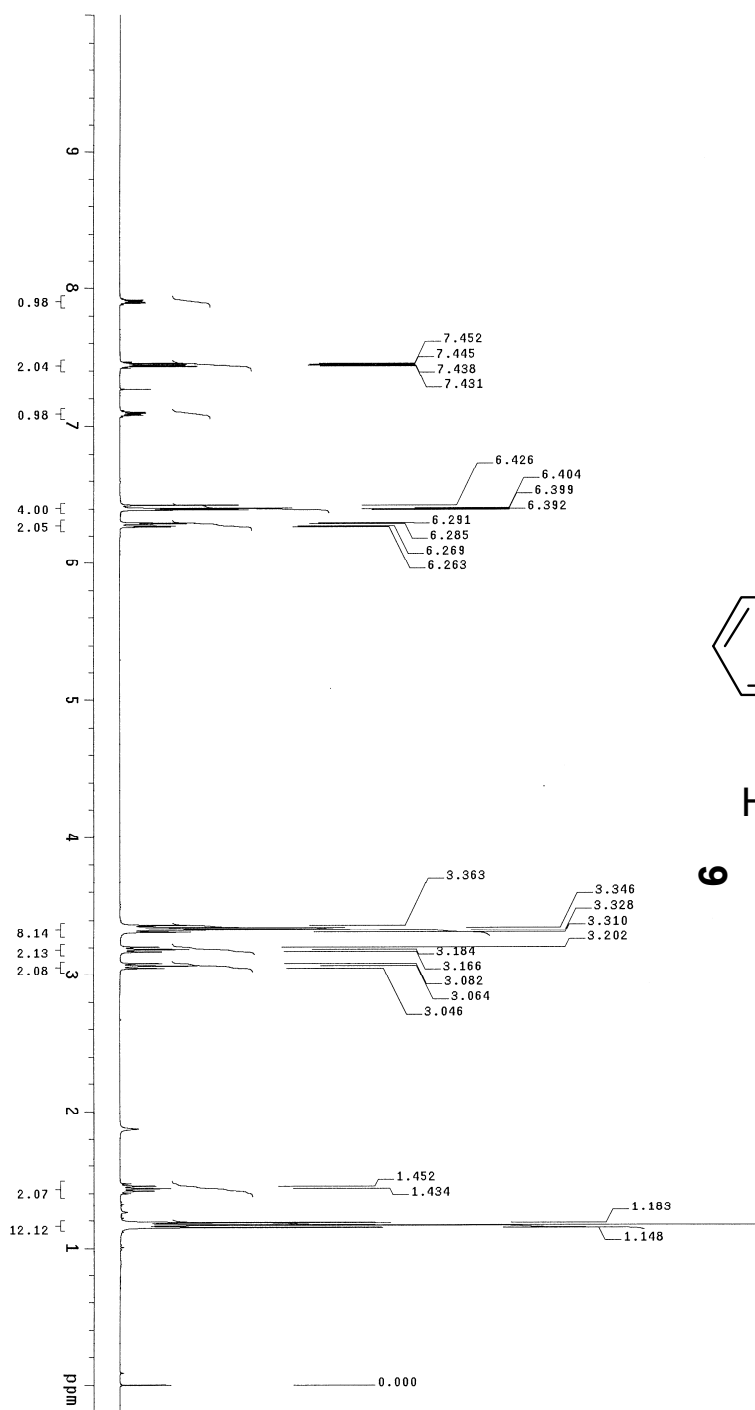



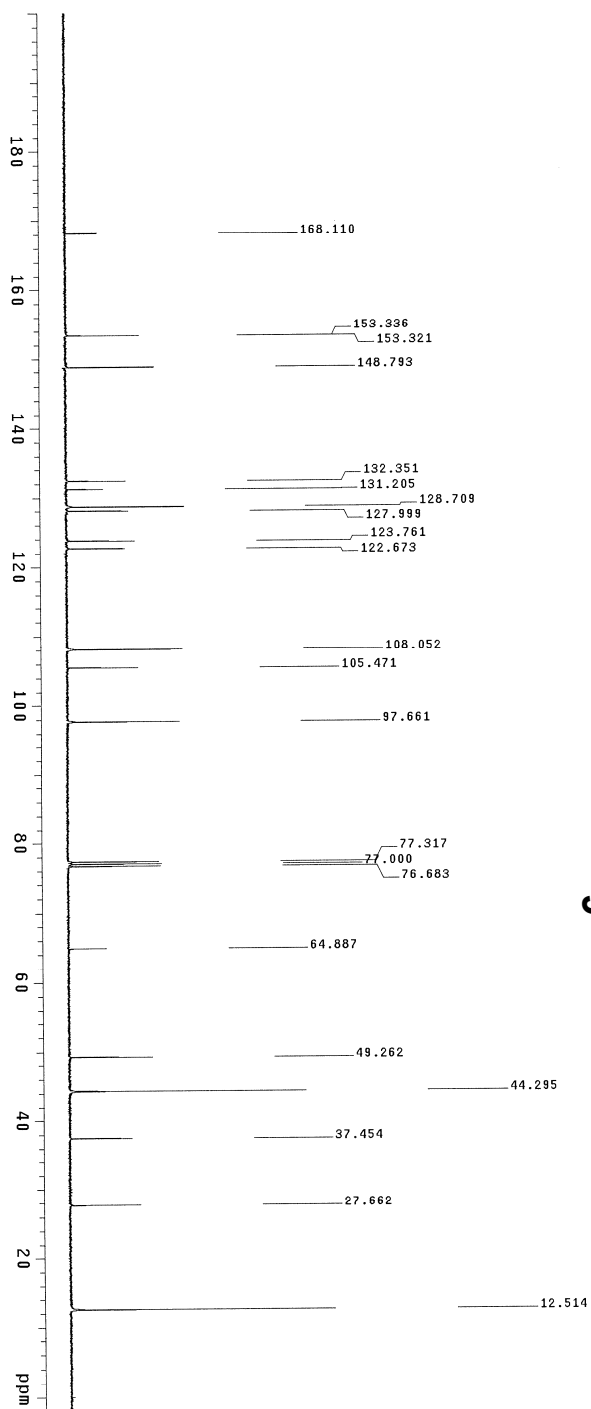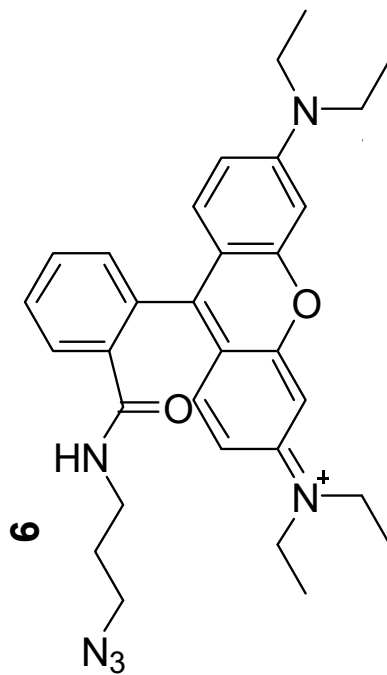

## Mass Spectrum SmartFormula Report

### Analysis Info

Analysis Name D:\Data\4\5CARBOXYFLUORESC EIN\_000004.d  
Method broadband first signal  
Sample Name 5-carboxyfluorescein  
Comment ESI Positive

12/31/2020 2:42:36 PM  
Operator: YU HSIAO-CHING  
Instrument: BRUKER FT-MS solariX

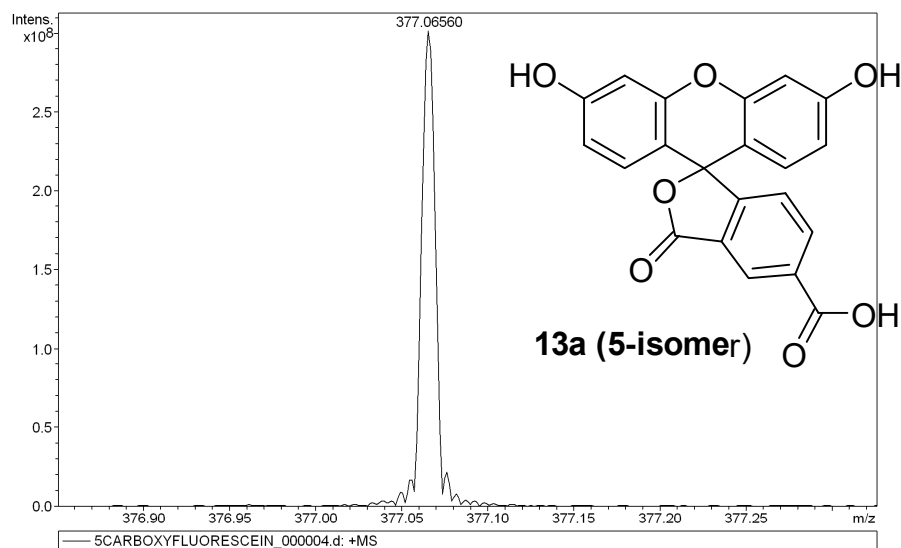

| Meas. m/z | # | Formula                                        | Score  | m/z       | err [mDa] | err [ppm] | mSigma | rdB  | e <sup>-</sup> Conf | N-Rule |
|-----------|---|------------------------------------------------|--------|-----------|-----------|-----------|--------|------|---------------------|--------|
| 377.06560 | 1 | C <sub>21</sub> H <sub>13</sub> O <sub>7</sub> | 100.00 | 377.06558 | -0.02     | -0.05     | 8.8    | 15.5 | even                | ok     |



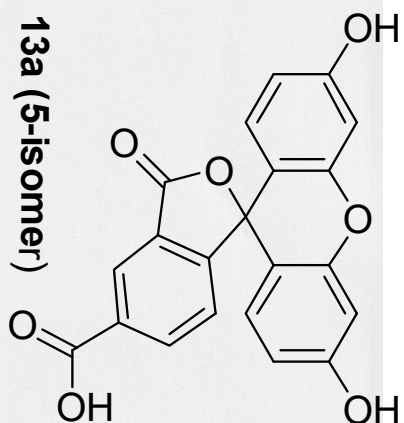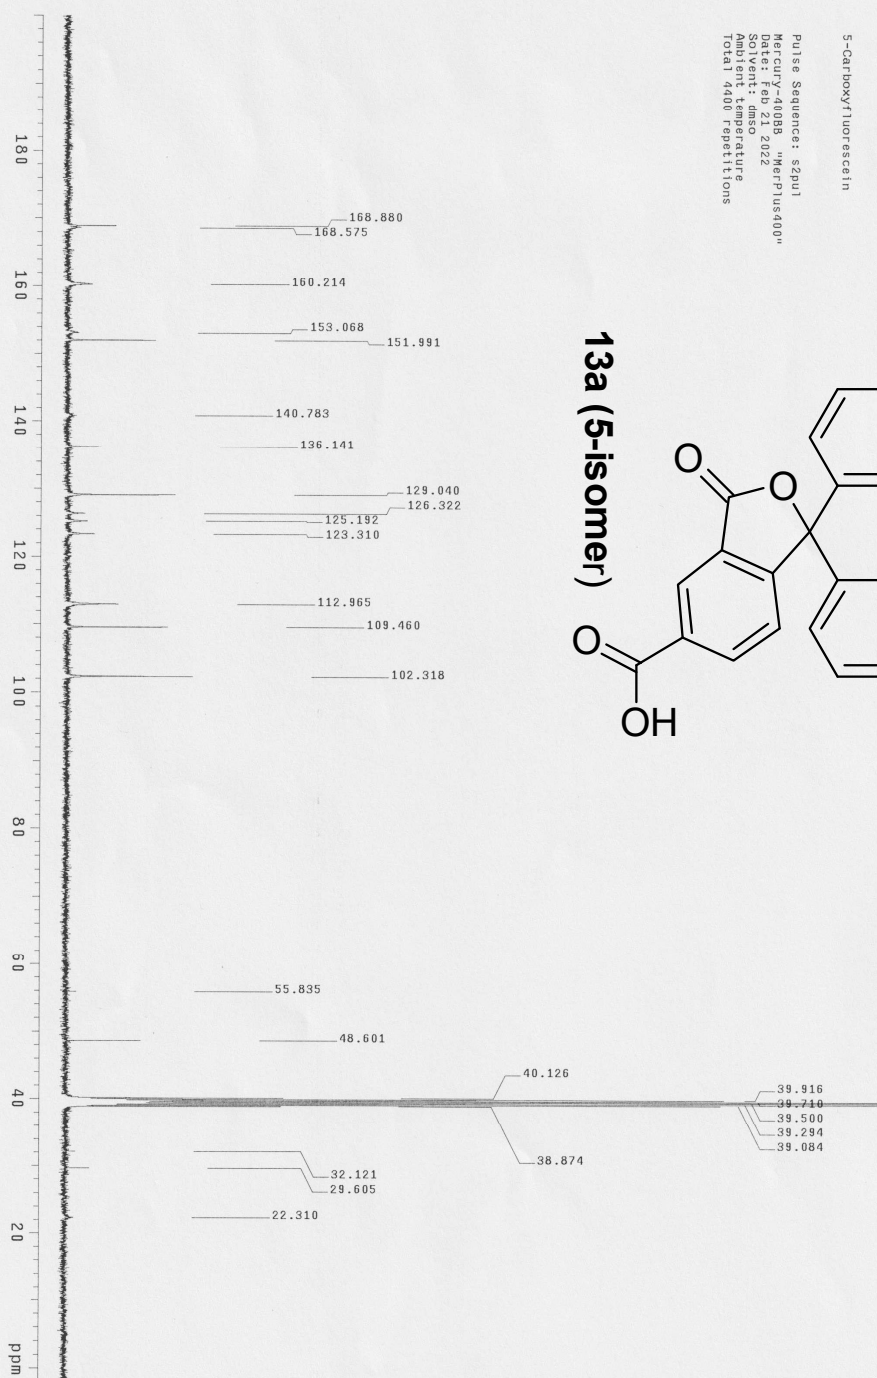

## Mass Spectrum SmartFormula Report

### Analysis Info

Analysis Name D:\Data\4\6CARBOXYFLUORESCIN\_000002.d  
Method broadband first signal  
Sample Name 6-carboxyfluorescein  
Comment ESI Positive

12/31/2020 2:44:40 PM  
Operator: YU HSIAO-CHING  
Instrument: BRUKER FT-MS solariX

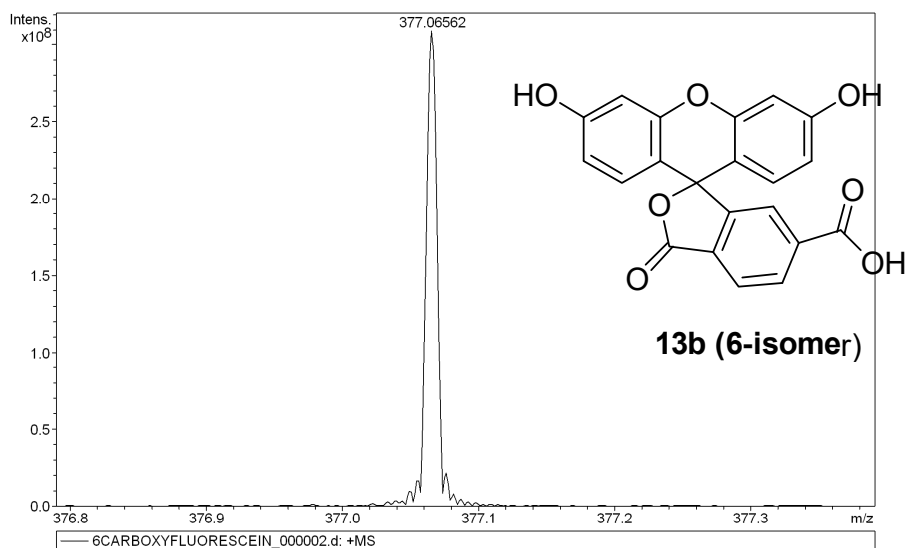

| Meas. m/z | # | Formula       | Score  | m/z       | err [mDa] | err [ppm] | mSigma | rdB  | e <sup>-</sup> Conf | N-Rule |
|-----------|---|---------------|--------|-----------|-----------|-----------|--------|------|---------------------|--------|
| 377.06562 | 1 | C 21 H 13 O 7 | 100.00 | 377.06558 | -0.04     | -0.10     | 7.5    | 15.5 | even                | ok     |

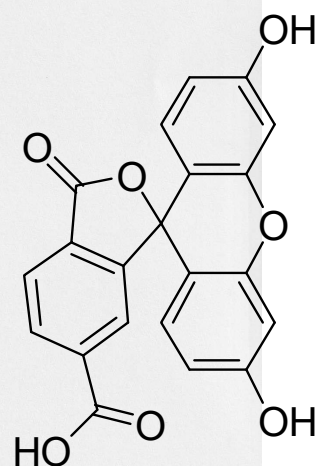

6-Carboxyfluorescein  
 Pulse Sequence: s2pu1  
 Mercury: 400MHz  
 Date: 08/20/22  
 Solvent: dms  
 Ambient temperature  
 Total: 32 repetitions

**13b (6-isomer)**

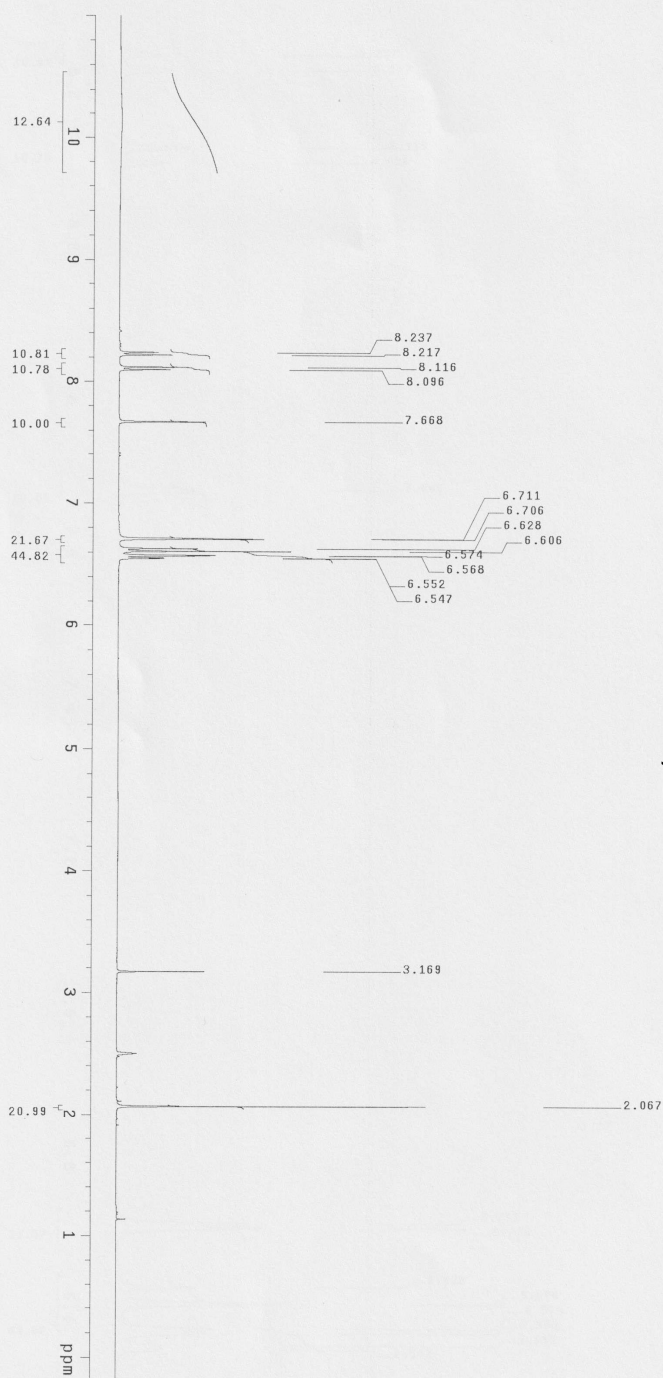

6-Carboxyfluorescein  
 Pulse Sequence: zgpg30  
 Mercury-400B, "MerPlus400"  
 Solvent: DMSO-d6  
 Ambient temperature  
 Total 1392 repetitions

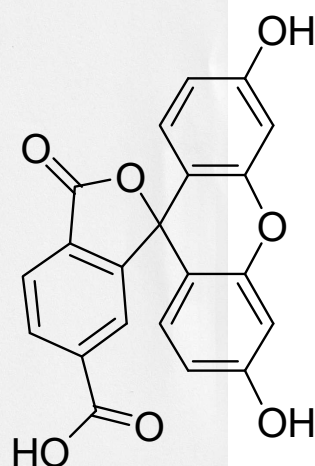

**13b (6-isomer)**

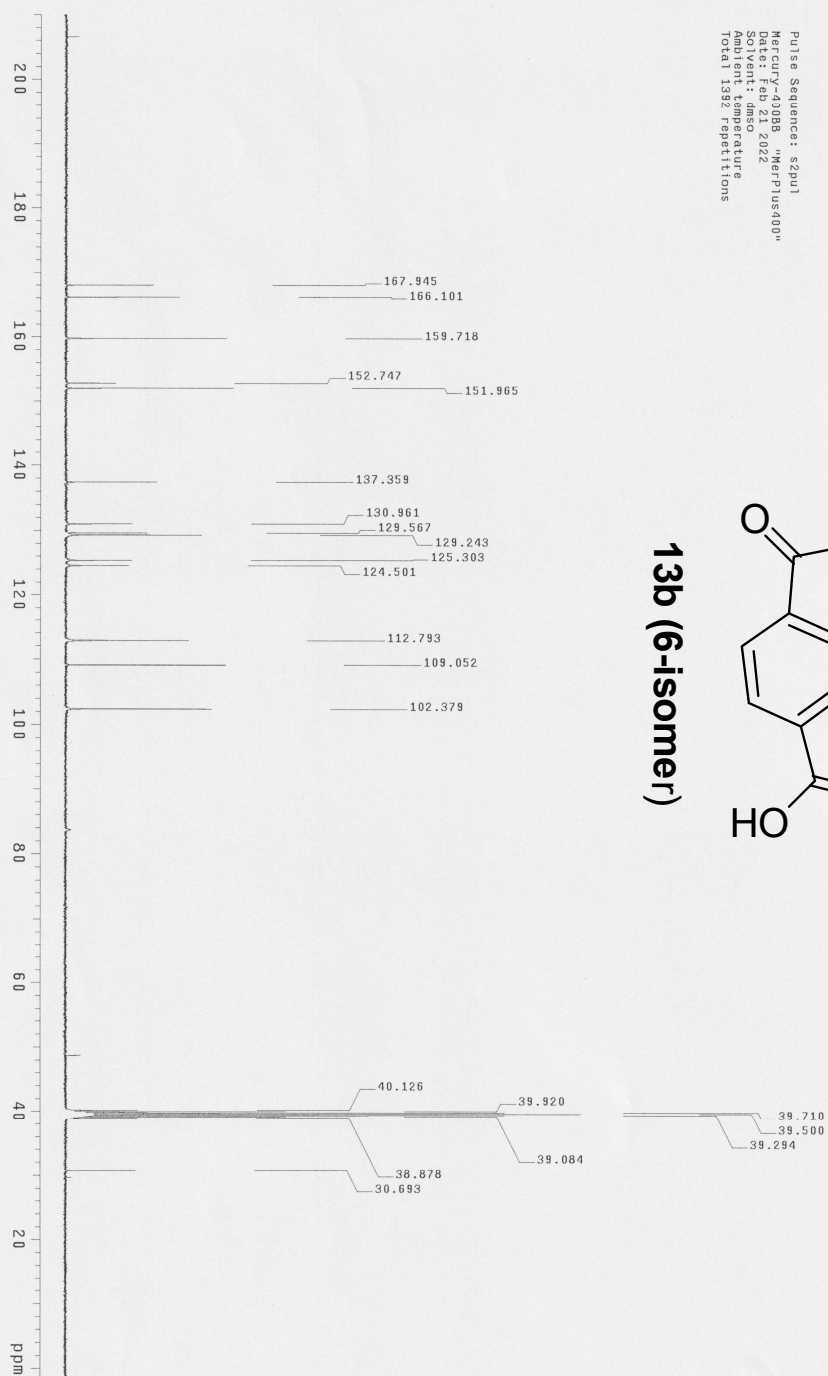

## Mass Spectrum SmartFormula Report

### Analysis Info

Analysis Name D:\Data\4\5FLUORESCINNHSESTER\_000003.d

Method broadband first signal

Sample Name 5-fluorescein-NHS ester

Comment ESI Positive

12/31/2020 2:55:28 PM

Operator: YU HSIAO-CHING

Instrument: BRUKER FT-MS solariX

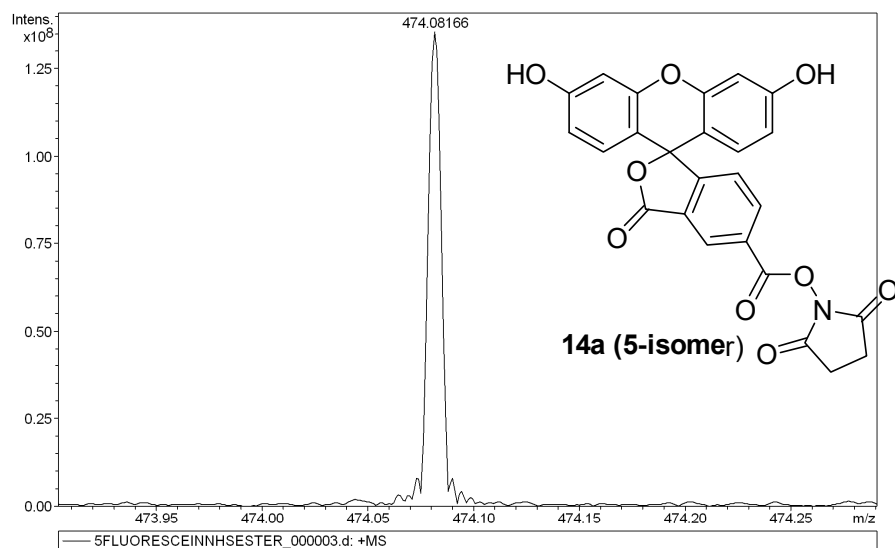

| Meas. m/z | # | Formula         | Score  | m/z       | err [mDa] | err [ppm] | mSigma | rdb  | e <sup>-</sup> Conf | N-Rule |
|-----------|---|-----------------|--------|-----------|-----------|-----------|--------|------|---------------------|--------|
| 474.08166 | 1 | C 25 H 16 N O 9 | 100.00 | 474.08196 | 0.30      | 0.63      | 13.1   | 18.5 | even                | ok     |



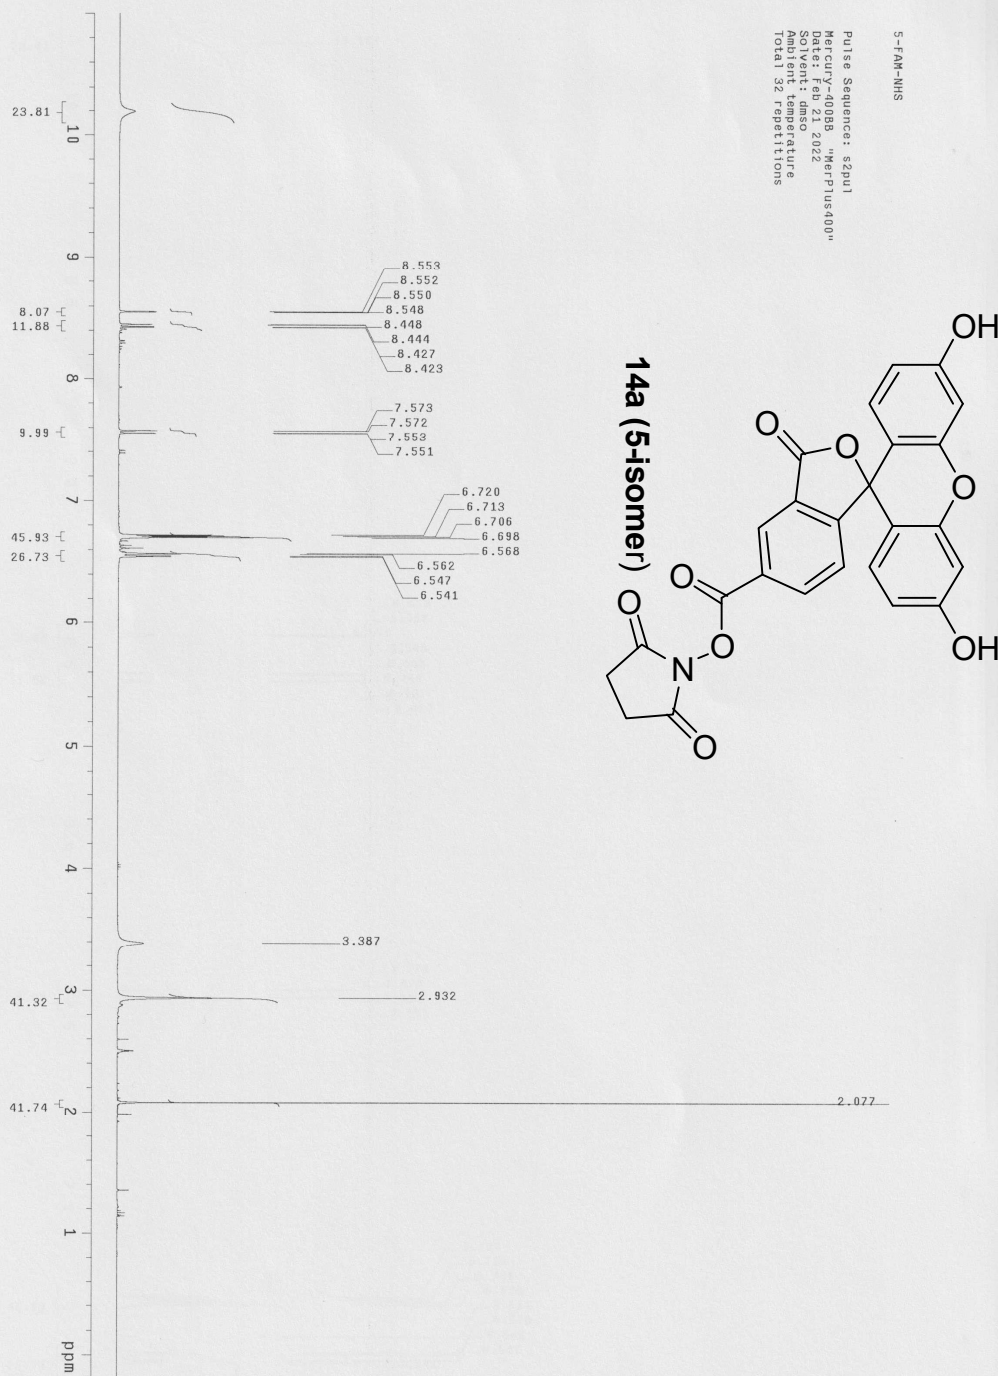

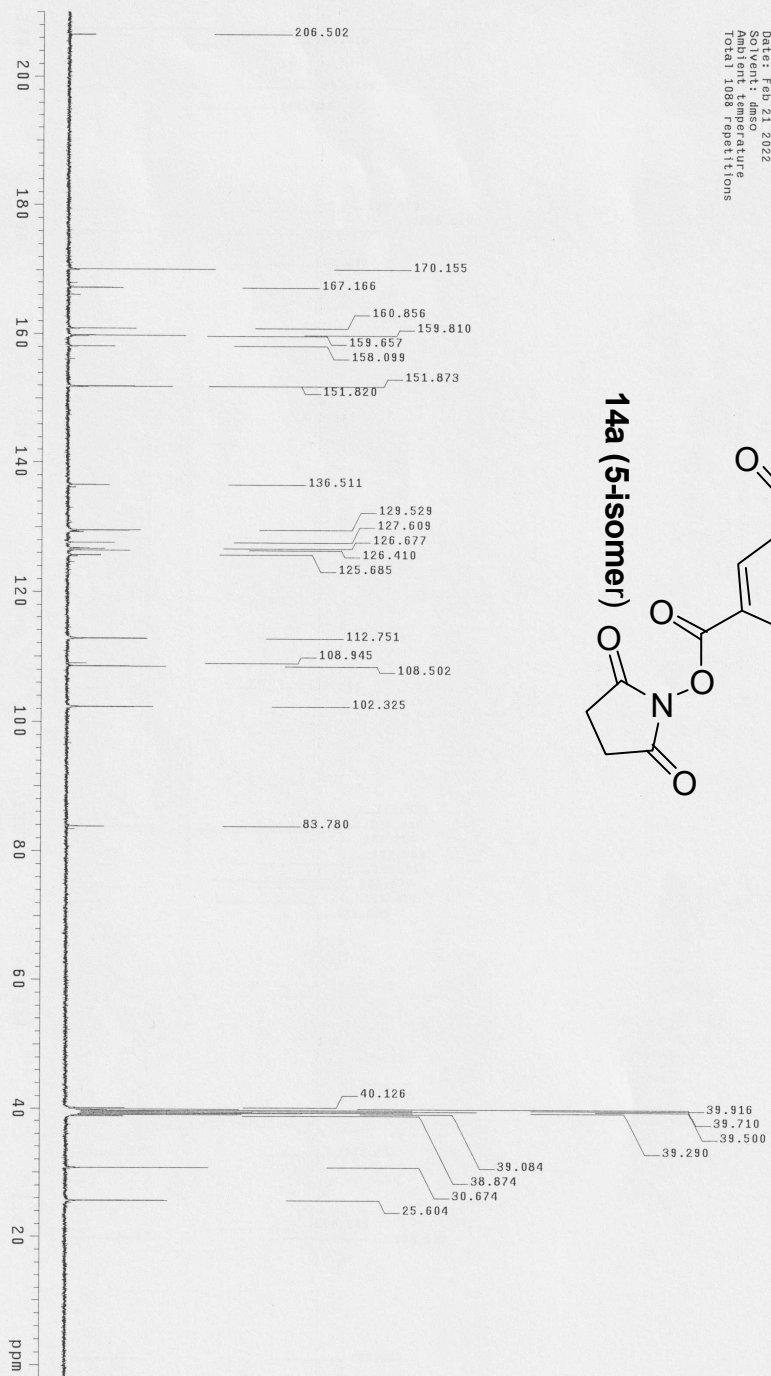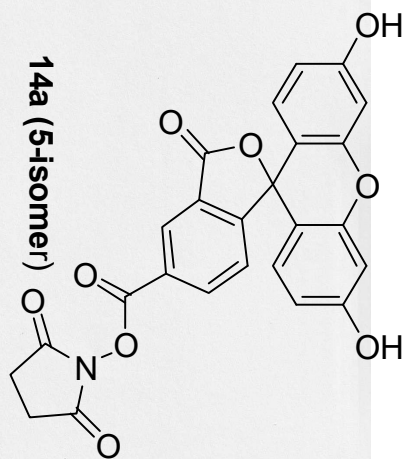

## Mass Spectrum SmartFormula Report

### Analysis Info

Analysis Name D:\Data\4\6FLUORESCINNHSESTER\_000006.d

Method broadband first signal

Sample Name 6-fluorescein-NHS ester

Comment ESI Positive

12/31/2020 3:15:11 PM

Operator: YU HSIAO-CHING

Instrument: BRUKER FT-MS solariX

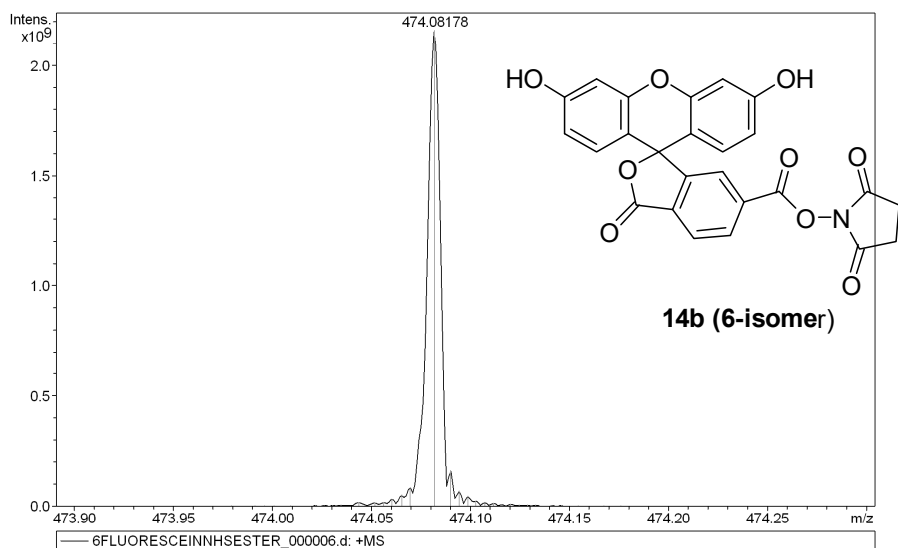

| Meas. m/z | # | Formula                                                       | Score  | m/z       | err [mDa] | err [ppm] | mSigma | rdb  | e <sup>-</sup> Conf | N-Rule |
|-----------|---|---------------------------------------------------------------|--------|-----------|-----------|-----------|--------|------|---------------------|--------|
| 474.08178 | 1 | C <sub>25</sub> H <sub>16</sub> N <sub>1</sub> O <sub>9</sub> | 100.00 | 474.08196 | 0.17      | 0.37      | 9.8    | 18.5 | even                | ok     |

6-FAM-NHS  
 Pulse Sequence: szpul  
 UNITYplus-400 "unity400"  
 Date: Feb 21 2022  
 Solvent: DMSO-d6  
 Temperature: 300 K  
 Total 64 repetitions

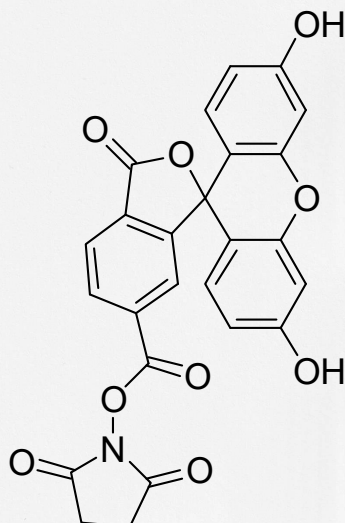

**14b (6-isomer)**

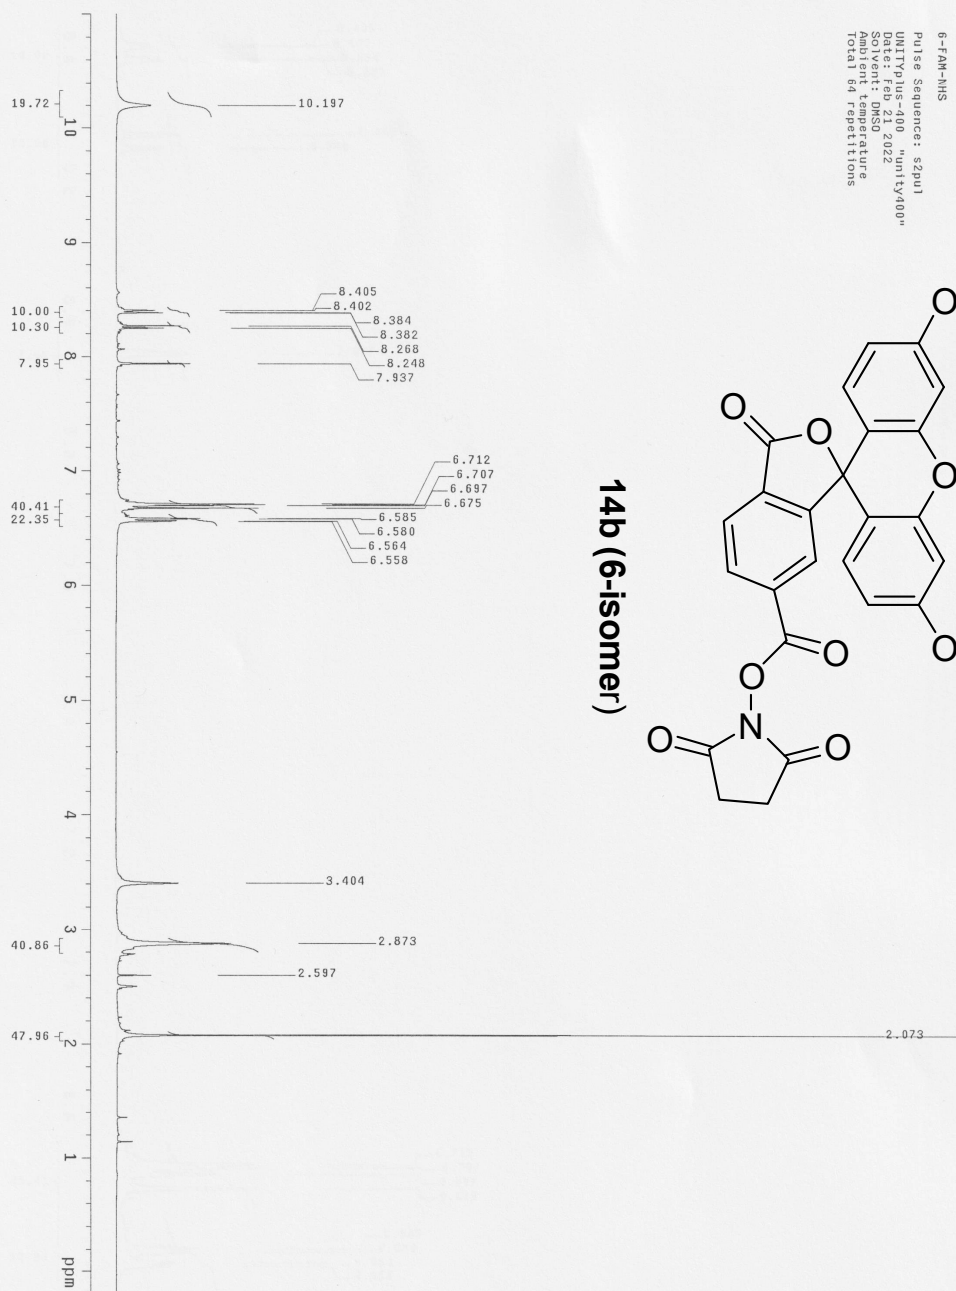

6-FAM-MHS  
Pulse Sequence: szpul  
UNITplus-400 "unity400"  
Date: Feb 21 2022  
Solvent: DMSO  
Acquire: 1000000  
Temperature: 300  
Total 3072 repetitions

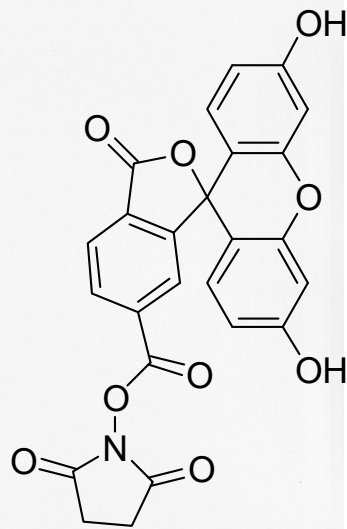

**14b (6-isomer)**

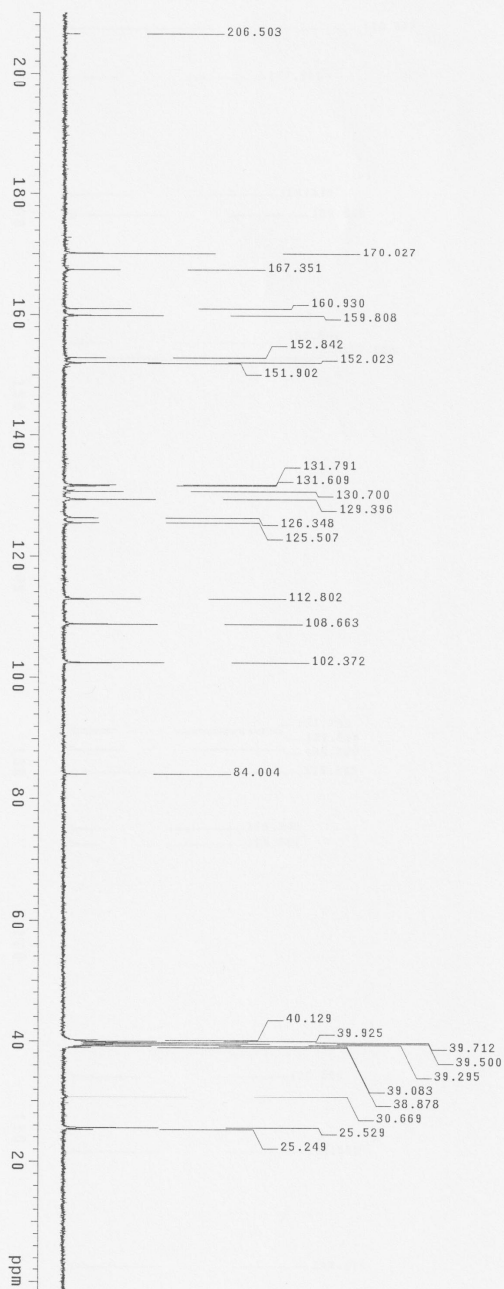

## Mass Spectrum SmartFormula Report

### Analysis Info

Analysis Name D:\Data\4\5FAMEXOBCN5\_000002.d  
Method broadband first signal  
Sample Name 5-FAM-exo-BCN-5  
Comment ESI Negative

4/9/2021 4:06:24 PM  
Operator: YU HSIAO-CHING  
Instrument: BRUKER FT-MS solariX

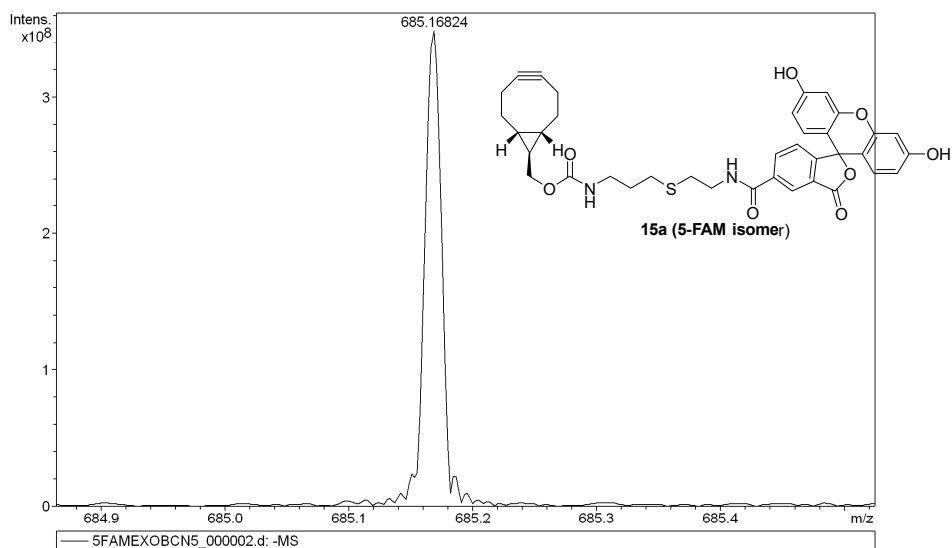

| Meas. m/z | # | Formula               | Score  | m/z       | err [mDa] | err [ppm] | mSigma | rdB  | e <sup>-</sup> Conf | N-Rule |
|-----------|---|-----------------------|--------|-----------|-----------|-----------|--------|------|---------------------|--------|
| 685.16824 | 1 | C 36 H 33 N 2 O 8 S 2 | 100.00 | 685.16838 | 0.14      | 0.20      | 55.1   | 21.5 | even                | ok     |

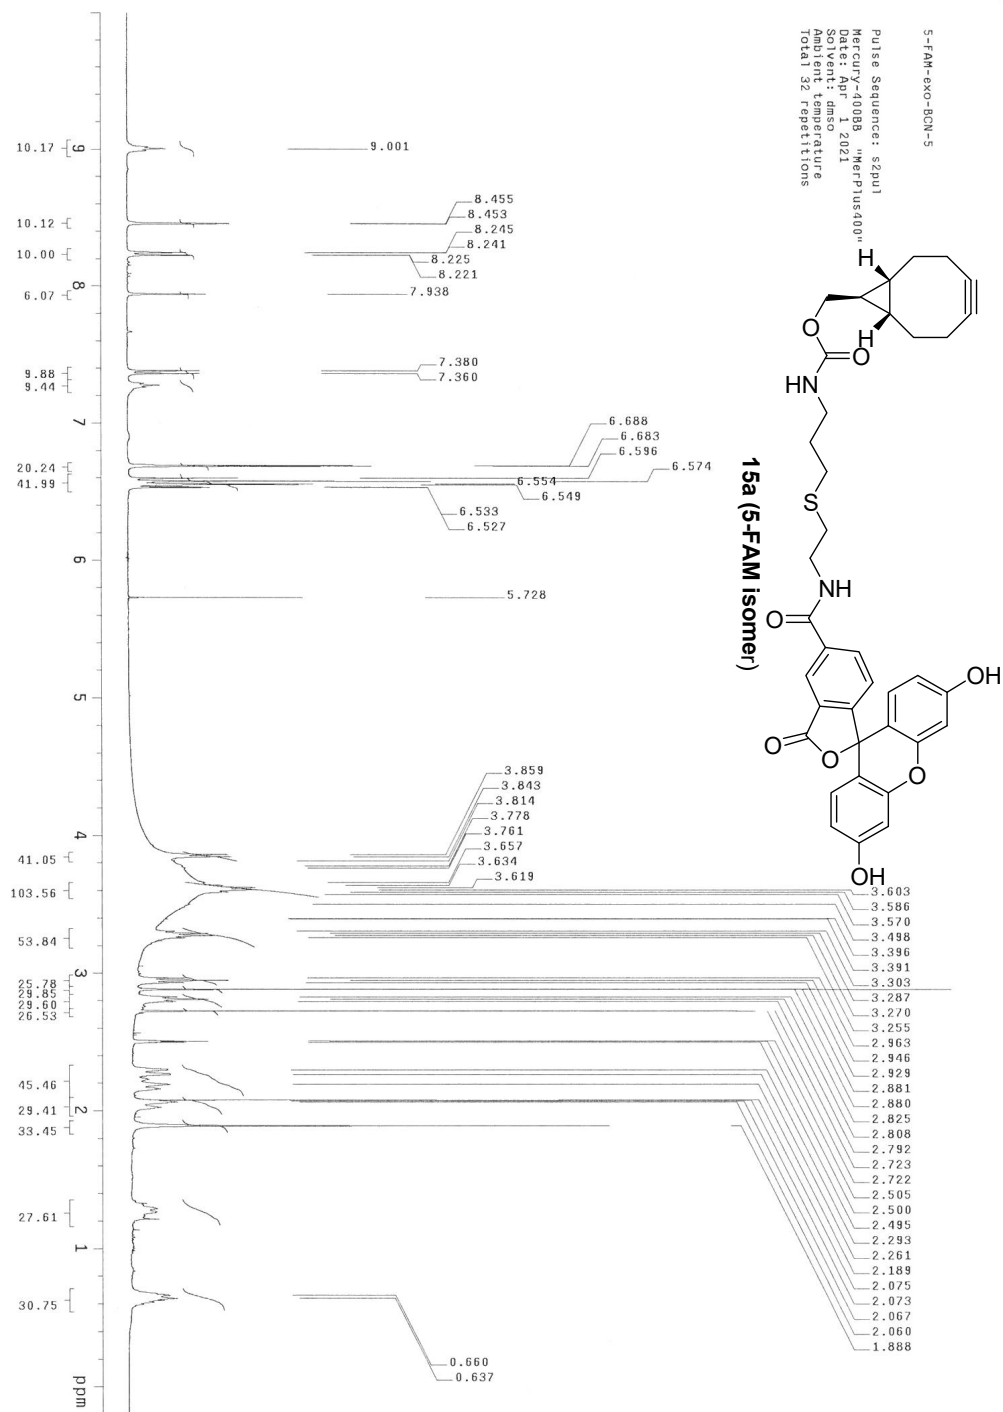

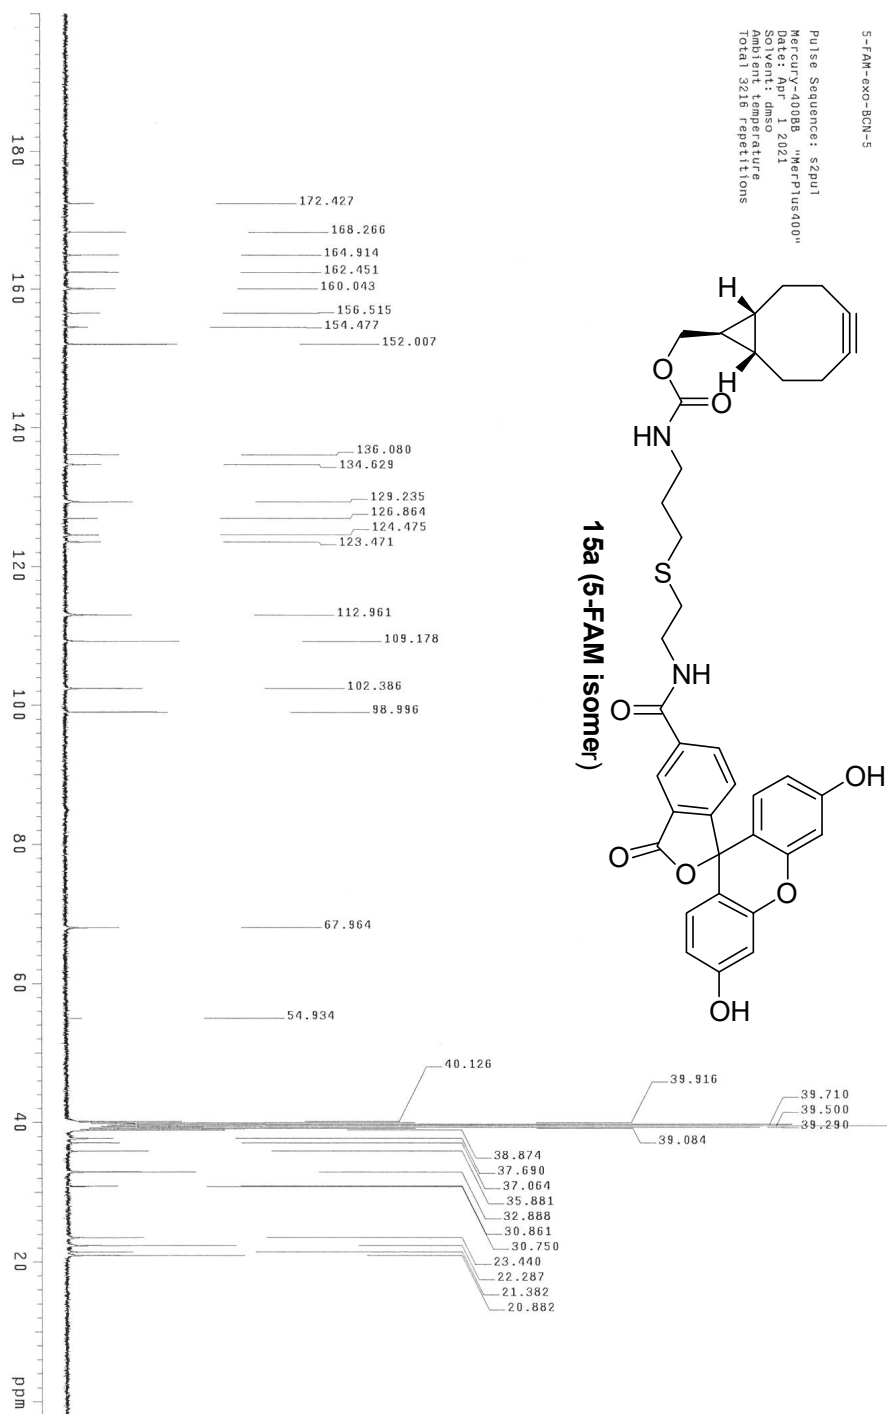



## Mass Spectrum SmartFormula Report

### Analysis Info

Analysis Name D:\Data\4\6FAMEXOBCN5\_000002.d  
Method broadband first signal  
Sample Name 6-FAM-exo-BCN-5  
Comment ESI Negative

4/9/2021 4:20:16 PM  
Operator: YU HSIAO-CHING  
Instrument: BRUKER FT-MS solariX

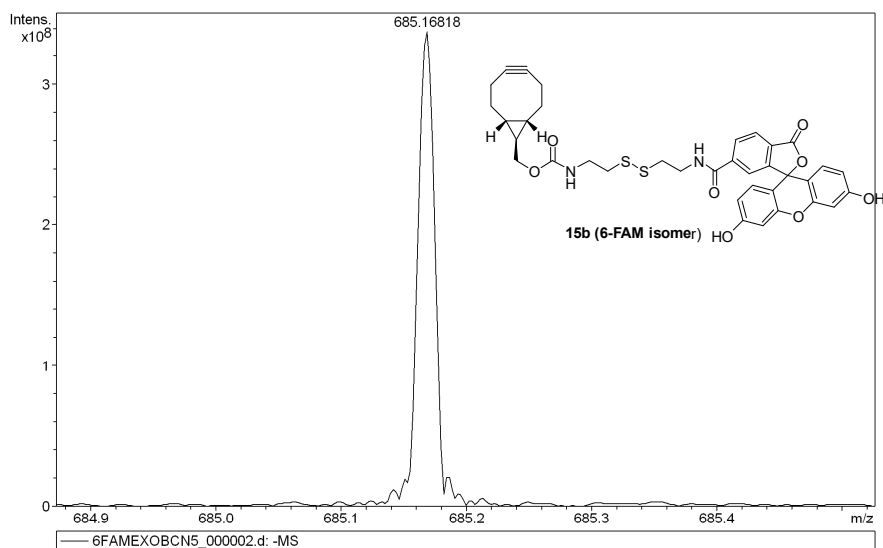

| Meas. m/z | # | Formula               | Score  | m/z       | err [mDa] | err [ppm] | mSigma | rdB  | e <sup>-</sup> Conf | N-Rule |
|-----------|---|-----------------------|--------|-----------|-----------|-----------|--------|------|---------------------|--------|
| 685.16818 | 1 | C 36 H 33 N 2 O 8 S 2 | 100.00 | 685.16838 | 0.20      | 0.29      | 60.3   | 21.5 | even                | ok     |

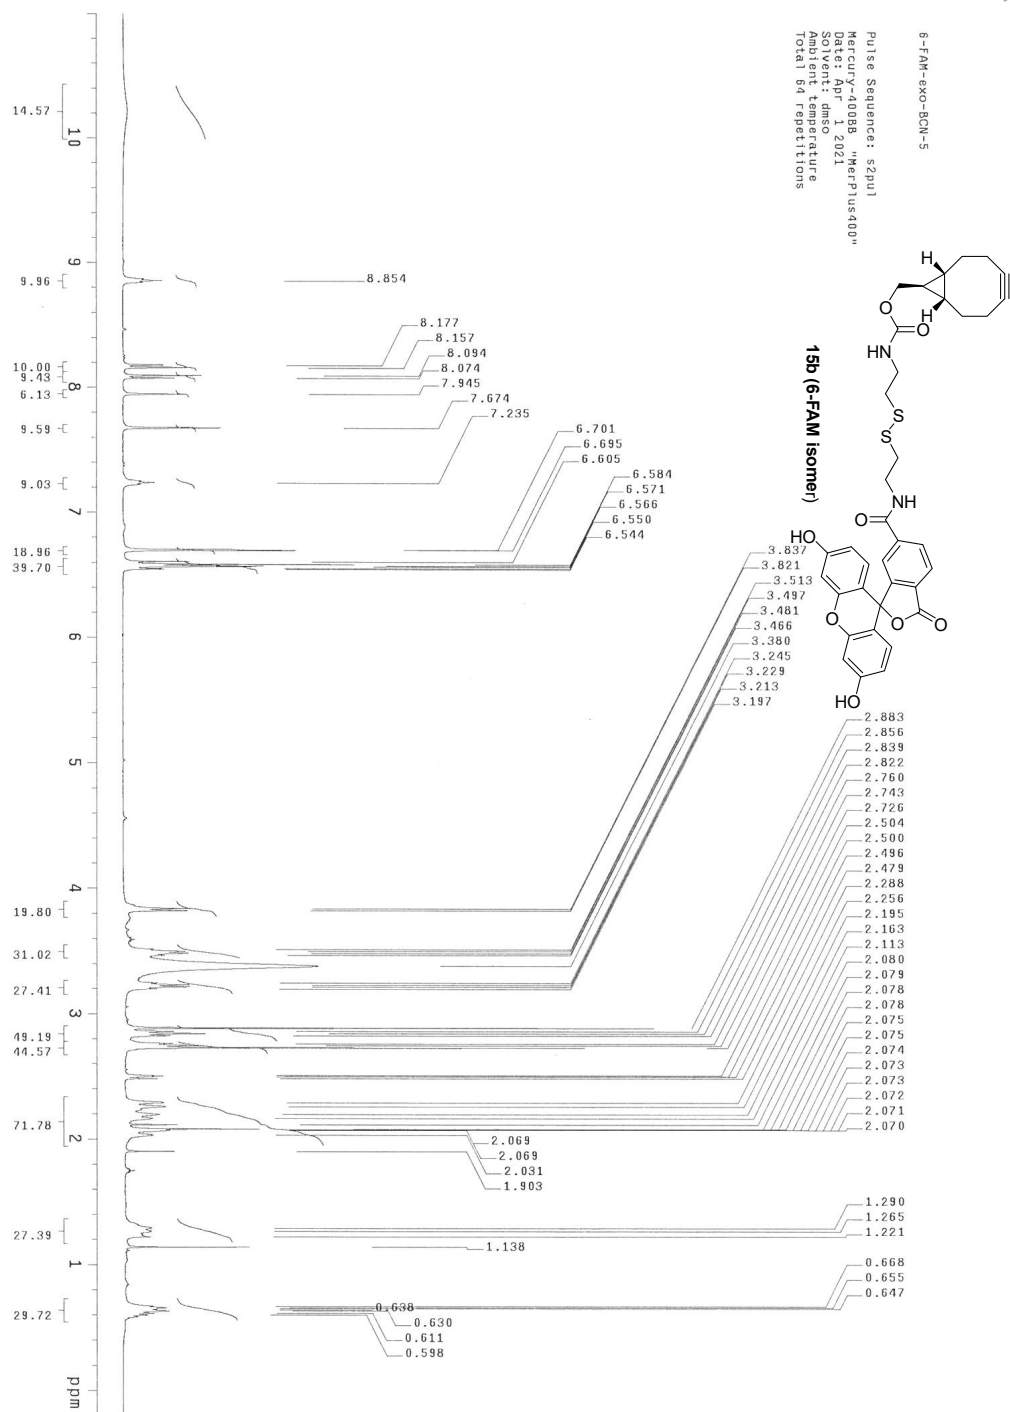

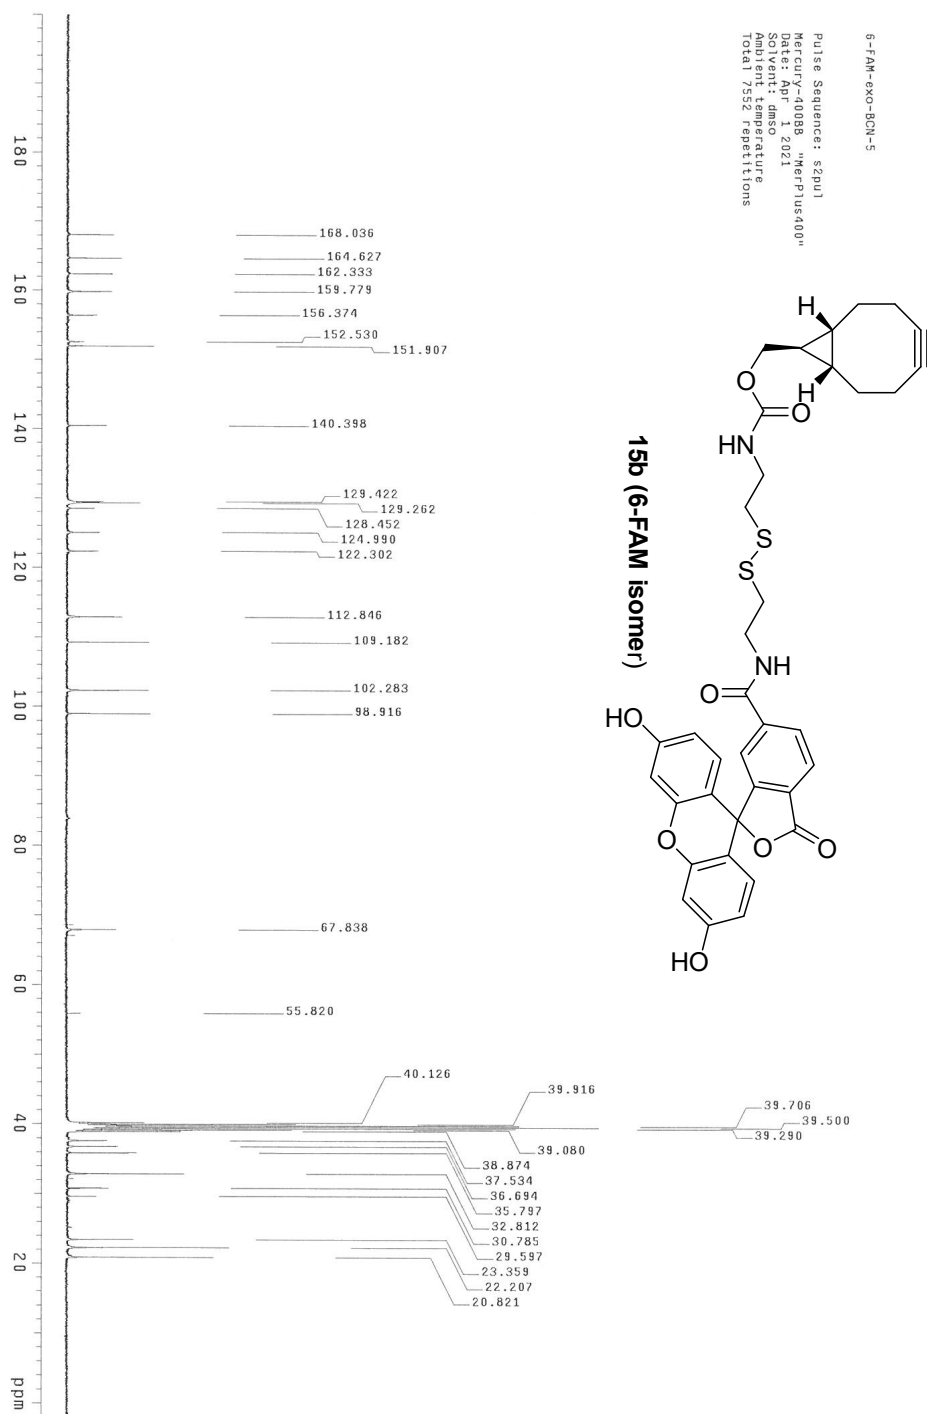

## Mass Spectrum SmartFormula Report

### Analysis Info

Analysis Name D:\Data\4\EXOBCN65\_000024.d  
 Method broadband first signal  
 Sample Name exo-BCN5-6(5)  
 Comment ESI Negative

12/31/2020 4:17:31 PM  
 Operator: YU HSIAO-CHING  
 Instrument: BRUKER FT-MS solariX

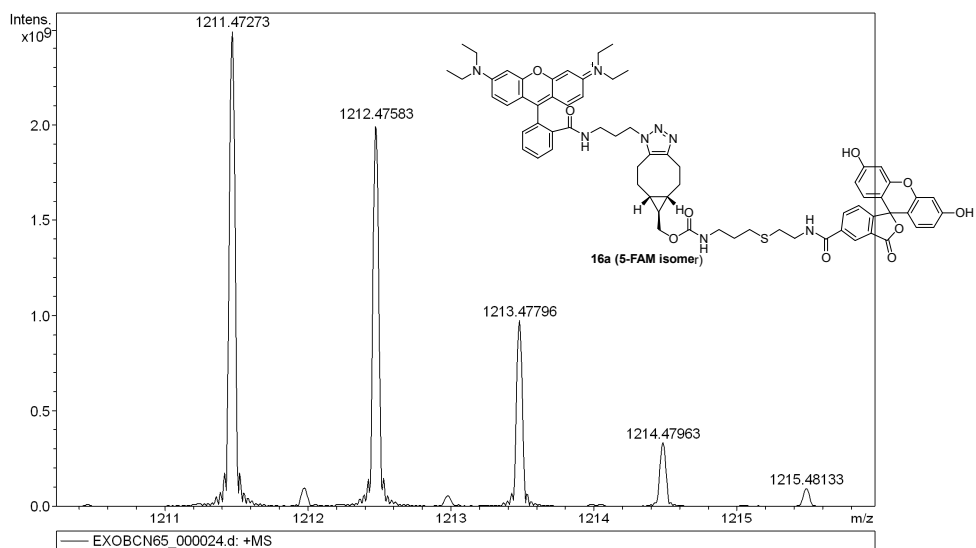

| Meas. m/z  | # | Formula                | Score  | m/z        | err [mDa] | err [ppm] | mSig ma | rdb  | e <sup>-</sup> Conf | N-R rule |
|------------|---|------------------------|--------|------------|-----------|-----------|---------|------|---------------------|----------|
| 1211.47273 | 1 | C 67 H 71 N 8 O 10 S 2 | 100.00 | 1211.47291 | 0.18      | 0.14      | 17.8    | 36.5 | even                | ok       |

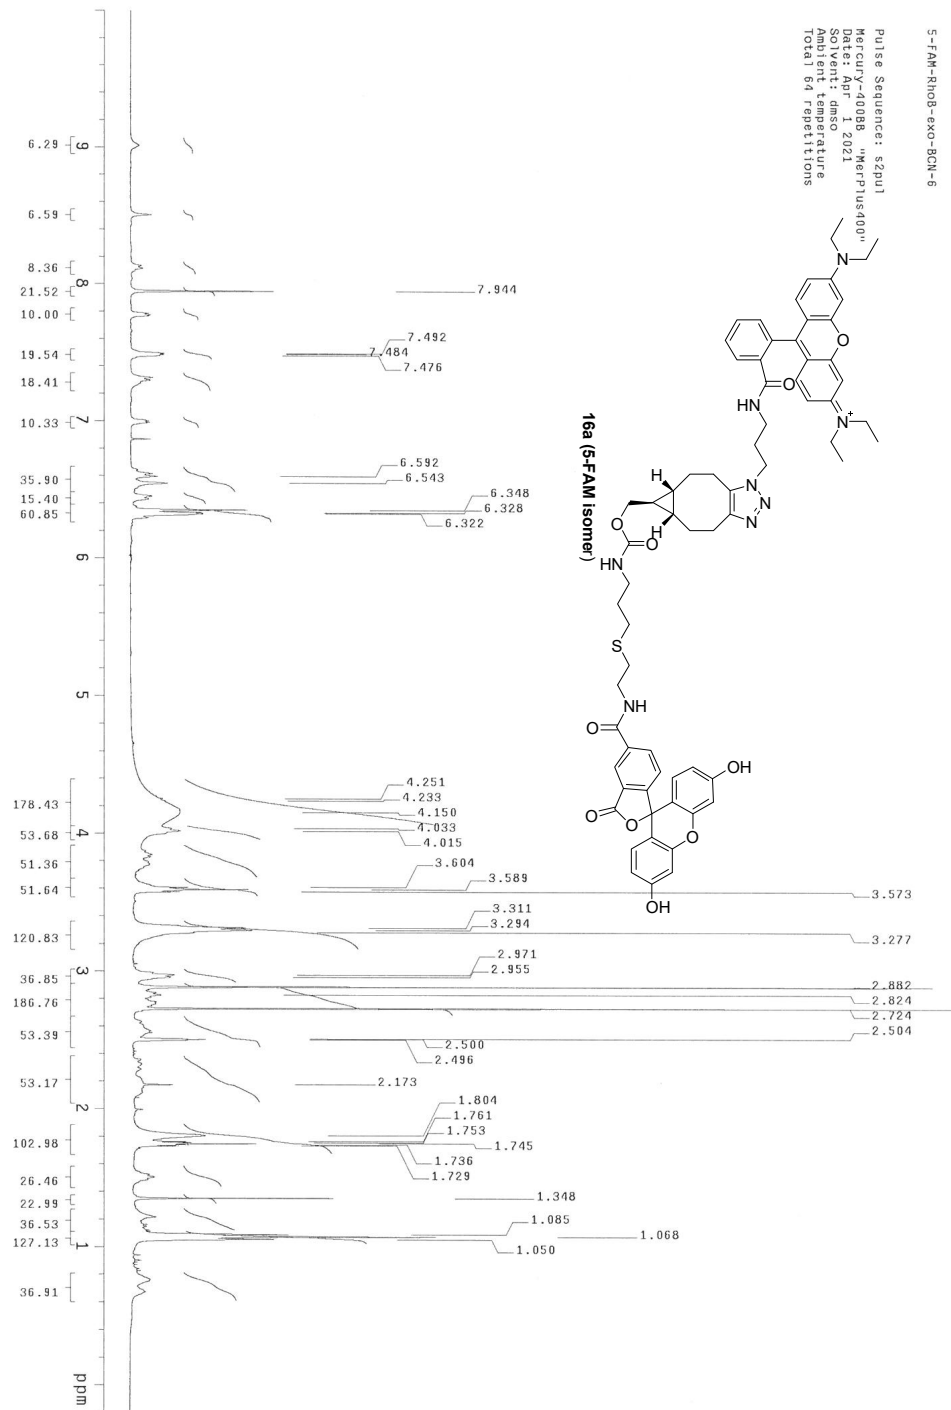

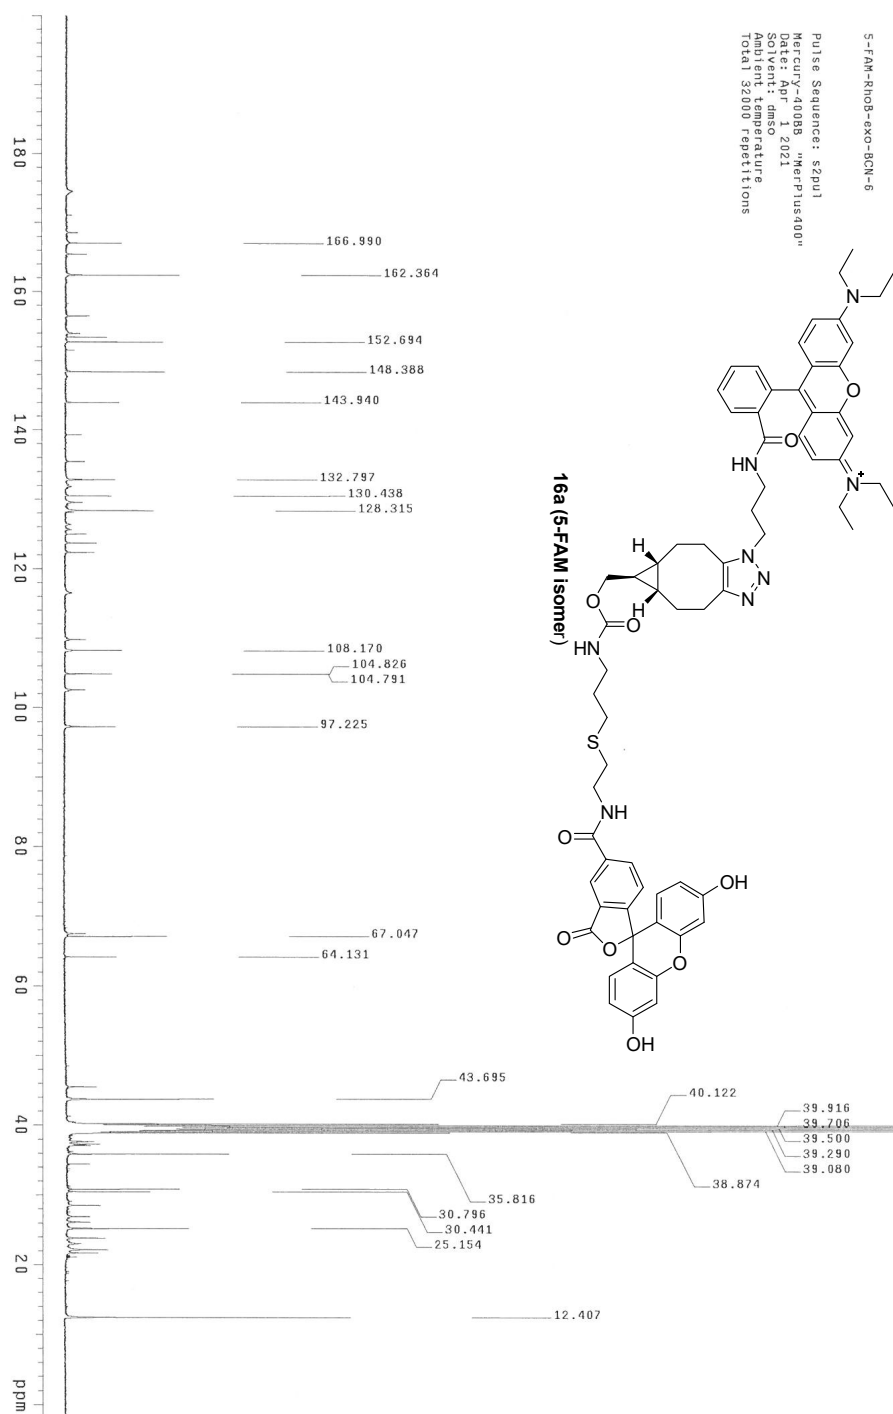

## Mass Spectrum SmartFormula Report

### Analysis Info

Analysis Name D:\Data\4\RHOB6FAMEXOBCN6\_000003.d  
 Method broadband first signal  
 Sample Name Rhoab-6-FAM-exo-BCN-6  
 Comment ESI Negative

4/9/2021 3:56:39 PM  
 Operator: YU HSIAO-CHING  
 Instrument: BRUKER FT-MS solariX

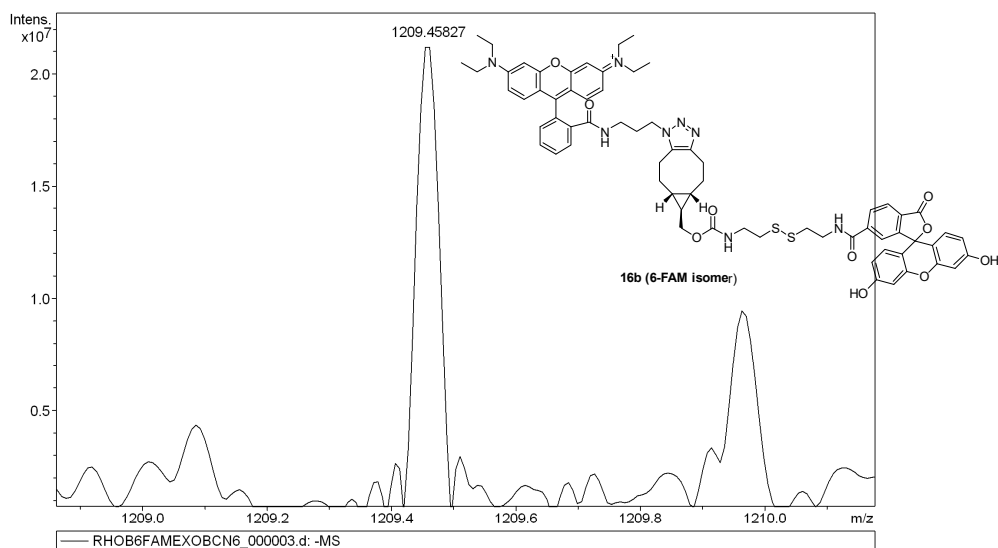

| Meas. m/z  | # | Formula                | Score  | m/z        | err [mDa] | err [ppm] | mSigma | rdB  | e <sup>-</sup> Conf | N-R ule |
|------------|---|------------------------|--------|------------|-----------|-----------|--------|------|---------------------|---------|
| 1209.45827 | 1 | C 67 H 69 N 8 O 10 S 2 | 100.00 | 1209.45836 | 0.09      | 0.07      | 132.2  | 37.5 | even                | ok      |

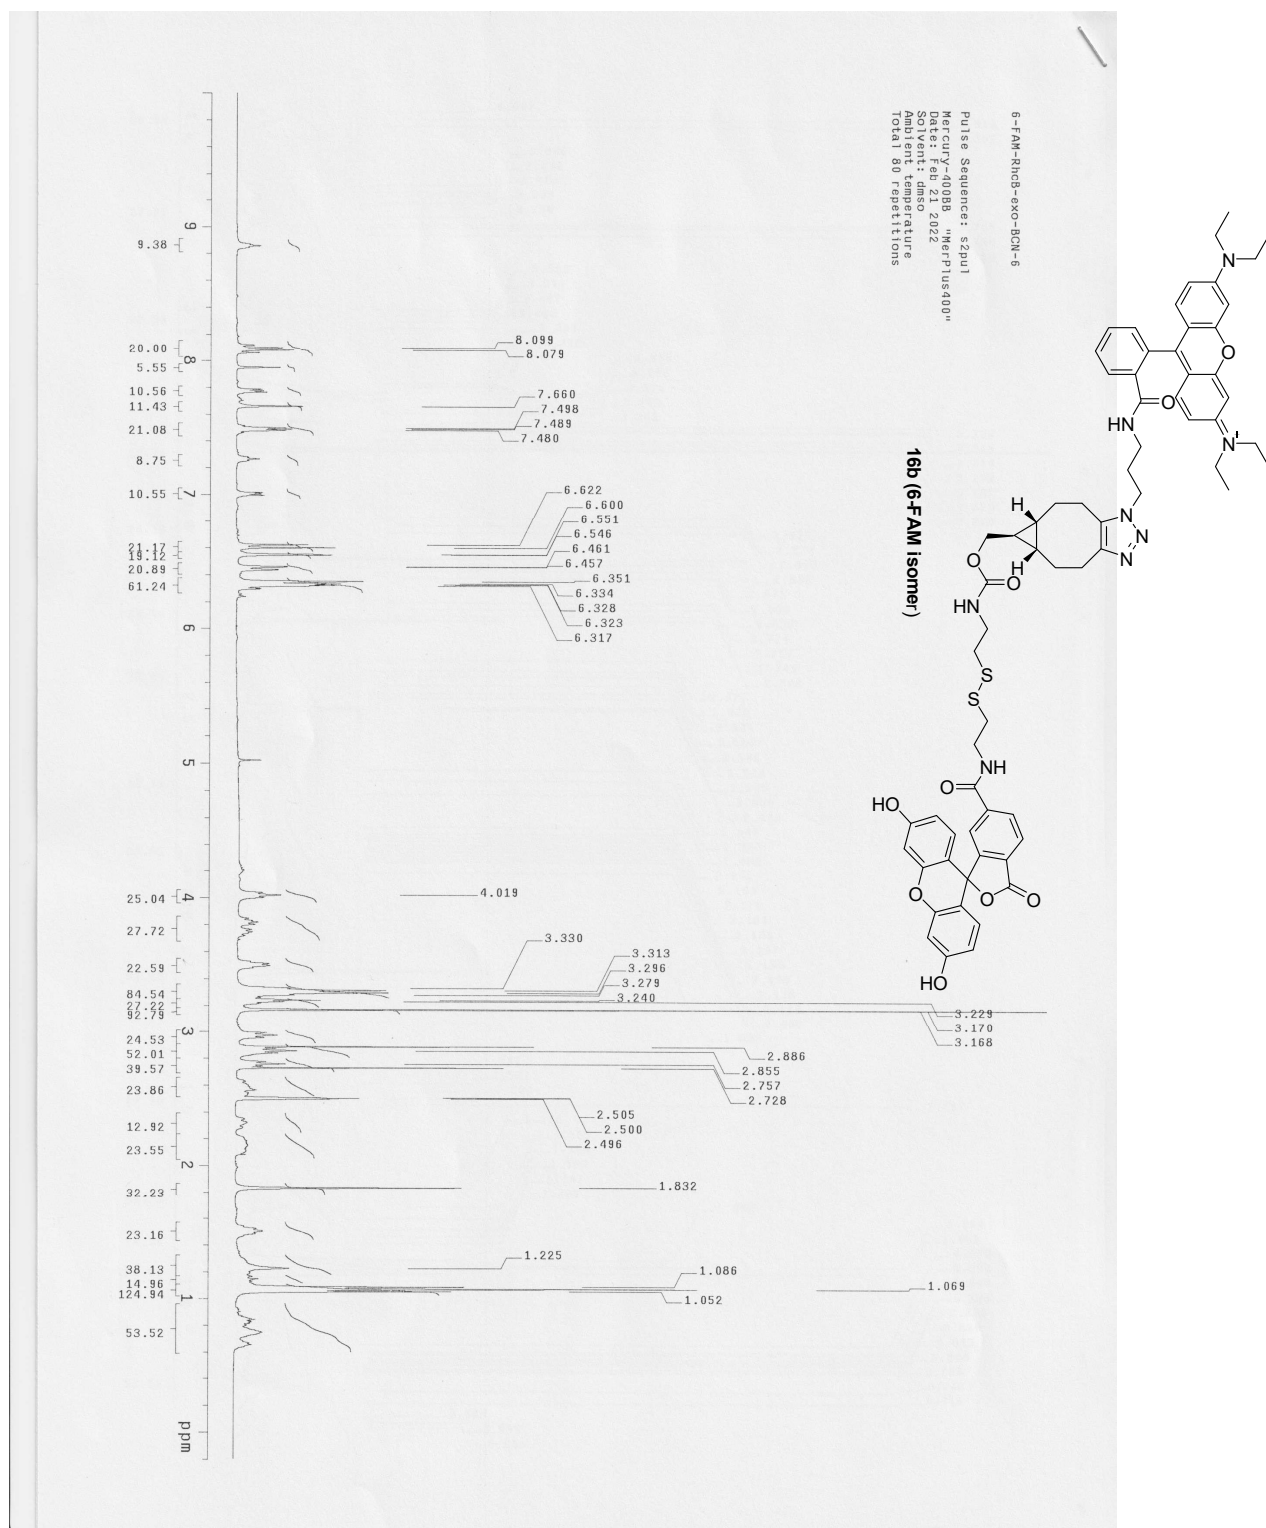



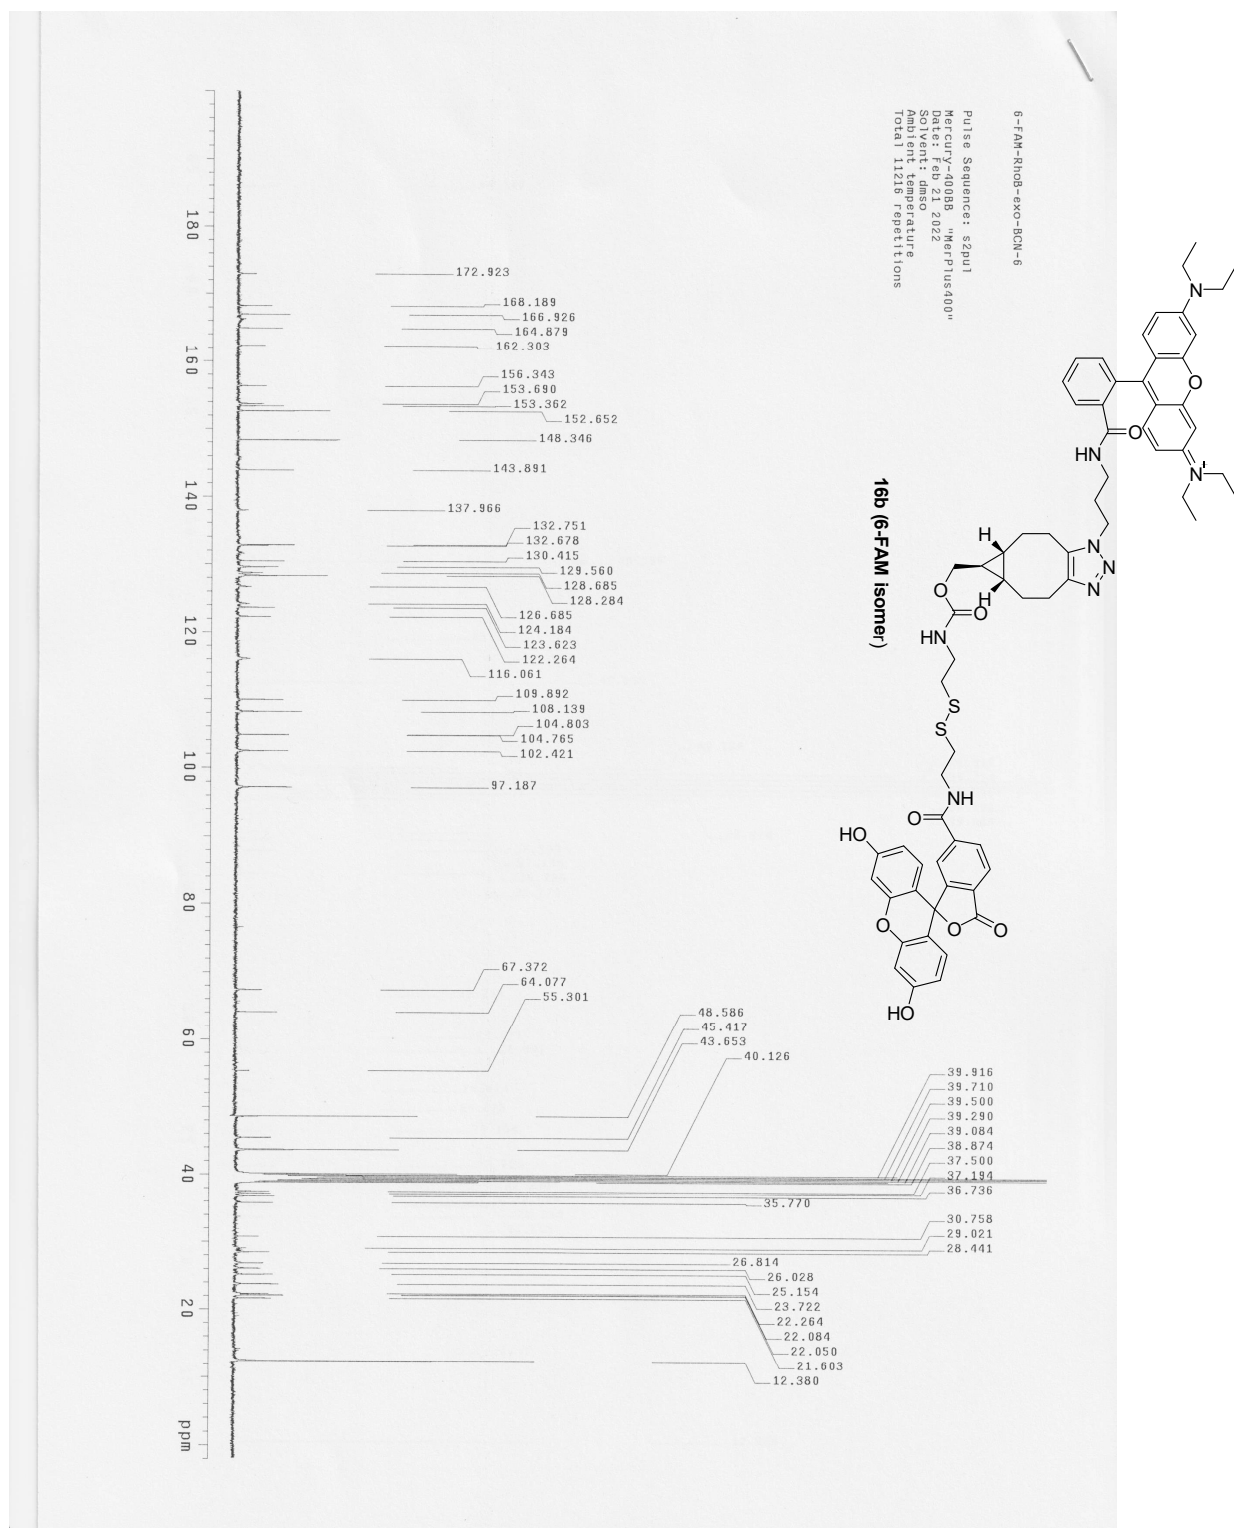

Supplement: s1 [file s1]
